# Supplementary material for: The formation of giant podiform chromitite by asthenospheric melts in supra-subduction zone environments
Source: Research Square preprint supplement (doi:10.21203/rs.3.rs-225374/v1), 2021-03-10
Supplement: Supplementary file 1 [file 0cfefc34cdce13d5332125b3.xlsx]

## Sheet: Cpx trace element compositions
Data 2-1 Trace-element compositions of clinopyroxene (ppm) from the Luobusa mantle peridotites
Sample	Lithology	Group	No.	Li	Sc	Ti	V	Cr	Mn	Co	Ni	Zn	Ga	Sr	Y	Zr	Nb	La	Ce	Pr	Nd	Sm	Eu	Gd	Tb	Dy	Ho	Er	Tm	Yb	Lu	Hf
1801	Harzburgite	Normal	1	11.8905	64.5945	1106.8	253.462	5803.64	848.799	20.4208	344.648	7.97897	2.67751	0.127152	11.2277	0.312253	0.0328871	0.00432628	0.000807257	0.0182439	0.218312	0.390828	0.196455	0.895849	0.220962	1.88847	0.461708	1.23301	0.243001	1.27385	0.185116	0.146975
			2	9.51759	64.5342	1092.16	244.502	5771.52	797.37	18.3614	314.797	4.81797	2.38796	0.13538	10.6866	0.294859	0.0203125	0.00275841	0.00413615	0.015229	0.16201	0.279934	0.139745	0.909885	0.193925	1.57572	0.398478	1.17344	0.198479	1.25958	0.183427	0.107112
			3	6.79173	65.7551	953.209	234.177	4260.98	765.842	20.9783	332.035	7.86735	2.3114	0.14292	9.00674	0.276598	0.0222708	0.0018709	0	0.00141549	0.180909	0.274246	0.120955	0.624045	0.204674	1.47199	0.34214	1.01369	0.170523	0.944122	0.139084	0.0767143
			4	8.40057	67.8997	1138.75	260.877	5520.27	854.871	20.05	340.09	7.3513	2.50624	0.169148	11.5095	0.389684	0.0241284	0	0.000884025	0.0145992	0.16139	0.312012	0.145216	0.679041	0.223056	1.83983	0.44447	1.43894	0.22124	1.45439	0.187899	0.10497
			5	6.93723	67.4049	1094.16	253.777	5110.13	813.4	20.9715	330.444	5.34725	2.11893	0.149797	9.89725	0.254286	0.0194266	0	0.00660446	0.00857192	0.175268	0.407335	0.123622	0.861323	0.203972	1.56457	0.401108	1.19381	0.198006	1.35559	0.162411	0.152037
			6	6.62299	58.906	1030.34	238.33	5424	750.156	23.4828	355.586	33.2546	2.61195	0.125145	8.20502	0.270806	0.0178664	0.00707595	0	0.0104486	0.14176	0.201748	0.120659	0.574232	0.163153	1.30974	0.32841	0.993591	0.163302	0.94718	0.145873	0.118422
			7	8.21994	58.5828	1077.24	249.059	5833.9	813.067	19.6192	335.81	3.88389	2.79129	0.143833	10.5718	0.235249	0.0144128	0.00142968	0	0.0124266	0.204406	0.331397	0.169711	0.8697	0.193723	1.67314	0.403044	1.14472	0.215979	1.23557	0.151348	0.122332
			8	8.23755	63.3419	1016.04	253.202	5919.73	835.31	21.1124	364.827	7.96702	3.07418	0.170795	10.9896	0.210794	0.0216359	0.00188578	0.00846632	0.00536039	0.20687	0.258396	0.158021	0.805397	0.224897	1.66315	0.444221	1.20675	0.223658	1.34333	0.159752	0.186032
			Average	8.32726	63.8774	1063.59	248.423	5455.52	809.852	20.6246	339.78	9.80855	2.55993	0.145521	10.2618	0.280566	0.0216176	0.00241837	0.00261228	0.0107869	0.181366	0.306987	0.146798	0.777434	0.203545	1.62332	0.402948	1.17474	0.204273	1.2267	0.164364	0.126824
			S. D.	1.74574	3.50769	59.766	8.88489	551.765	37.5517	1.47151	15.5289	9.60785	0.298383	0.0172394	1.14858	0.0545611	0.00542768	0.00235149	0.00336466	0.00554015	0.0265276	0.0686195	0.0268786	0.132233	0.0205701	0.1883	0.0480436	0.138482	0.0272319	0.18648	0.0189867	0.0338384
1724	Harzburgite	Normal	1	3.99495	53.0181	516.552	207.953	7473.39	785.268	21.105	367.589	6.12523	2.23851	0.293536	4.86262	0.076202	0.0279733	0.00453074	0.0125995	0.00249001	0.0112268	0.058685	0.0119875	0.25167	0.0581969	0.65054	0.151583	0.583188	0.0831159	0.535753	0.0947574	0.0204906
			2	5.54803	58.9194	562.359	190.653	6428.33	712.743	19.7346	332.556	6.19602	1.74852	0.511399	5.02173	0.0648889	0.0303937	0.00742591	0.013751	0.00137583	0.0303285	0.0443451	0.0186654	0.222946	0.0579432	0.720406	0.185934	0.56196	0.0848435	0.564285	0.0919378	0.0237343
			3	6.26415	53.5427	498.955	190.561	6542.46	788.814	21.6512	364.818	7.37476	2.09896	0.305654	4.71891	0.0395921	0.023477	0.0121834	0.00855385	0.00106391	0	0.0405142	0.0288652	0.210526	0.0741422	0.640564	0.145399	0.555817	0.0910663	0.545093	0.0930616	0.0219547
			4	6.93711	53.9655	498.786	195.875	6789.03	808.864	22.3689	365.102	6.65029	2.13023	0.317447	4.40431	0.0330668	0.027916	0.0030717	0.00822175	0.00111557	0.0208853	0.0899404	0.0342757	0.0908041	0.0677635	0.53834	0.151048	0.546897	0.0699446	0.490744	0.084665	0.0295101
			5	4.17438	55.6503	528.991	170.982	4711.47	701.775	18.558	306.579	5.42712	1.47116	0.201792	4.23689	0.0437015	0.0108417	0.00571516	0.01053	0.000977584	0.0304292	0.0485836	0.0389892	0.156083	0.0631873	0.540976	0.155298	0.501908	0.0899139	0.618574	0.0808278	0.0172206
			6	4.78845	55.2729	568.044	188.33	6694.72	722.997	18.5613	328.243	6.0673	1.89815	0.216908	5.14162	0.0621418	0.0268732	0.000578044	0.015513	0.00019261	0.00852817	0.0847358	0.0210388	0.266346	0.0646856	0.668595	0.183222	0.459502	0.0898655	0.55206	0.0891519	0.0482342
			7	4.834	54.8932	547.888	191.85	6823.26	730.161	19.8624	344.754	6.49817	2.00398	0.373523	4.89262	0.069861	0.0243805	0.00797299	0.00545452	0.000674768	0.0312682	0.0149579	0.0346171	0.231732	0.0642748	0.614206	0.166849	0.59328	0.0980868	0.580372	0.0846911	0.0310869
			8	3.63572	59.3562	559.263	180.463	5136.92	730.755	17.8234	303.154	6.0872	1.49537	0.120094	5.00565	0.028692	0.0171484	0.00429222	0.0027214	0.000668305	0	0.0241425	0.00189077	0.0647832	0.0538065	0.620507	0.181126	0.620921	0.0928707	0.623921	0.110759	0.0145916
			Average	5.0221	55.5773	535.105	189.583	6324.95	747.672	19.9581	339.099	6.30326	1.88561	0.292544	4.78554	0.0522683	0.0236255	0.00572127	0.00966813	0.00106982	0.0165833	0.0507381	0.0237912	0.186861	0.063	0.624267	0.165057	0.552934	0.0874634	0.56385	0.0912314	0.0258529
			S. D.	1.15092	2.36953	28.2393	10.7903	925.207	40.318	1.62661	25.8884	0.563118	0.289558	0.11889	0.316052	0.0181175	0.00654259	0.00351869	0.00430138	0.000676968	0.0134078	0.0264397	0.0127428	0.0750912	0.00637521	0.0616439	0.0164175	0.0515817	0.00844752	0.0439174	0.00922762	0.0106333
1829b	Harzburgite	Normal	1	1.9334	56.4741	686.217	224.54	8179.05	792.528	20.2743	347.206	6.33392	2.50236	0.0536639	6.02286	0.0153035	0.0193578	0	0	0.00824553	0.0108253	0.108662	0.0657827	0.463113	0.117888	0.942689	0.237017	0.745251	0.130427	0.814045	0.0862506	0.0144352
			2	3.22596	55.0906	650.452	214.527	7214.5	778.442	18.3411	331.762	4.72826	2.3916	0.0733551	6.2099	0.0984071	0.034907	0	0.00424456	0.00332352	0.0728032	0.106854	0.0627365	0.45586	0.121951	0.900193	0.226615	0.693665	0.127727	0.795339	0.0936063	0.0553735
			3	2.94831	58.5673	702.857	218.961	7158.24	700.583	17.7529	305.615	5.37509	2.18698	0.0636339	6.47423	0.0375953	0.0327243	0	0.00763234	0.00872989	0.0365786	0.118859	0.0675624	0.419959	0.127667	0.966638	0.25194	0.81981	0.117141	0.810827	0.0940248	0.0554157
			4	3.98102	57.7501	630.829	232.232	7847.51	869.424	24.5767	401.225	13.1816	3.07566	0.0109971	6.14512	0.0757257	0.0205827	0.00117707	0.00504731	0.00265236	0.0783712	0.184628	0.071116	0.358716	0.0960181	1.0718	0.228842	0.741642	0.130876	0.701722	0.0822877	0.0948522
			5	7.60965	57.579	702.595	234.428	8091.98	820.528	21.3263	360.333	7.79593	2.72195	0.0579274	6.58654	0.0351306	0.0329904	0	0	0	0.0911774	0.0905142	0.0676718	0.531192	0.121355	1.01882	0.263146	0.756894	0.132947	0.905726	0.0982331	0.0493776
			6	4.23251	57.9586	645.993	230.082	8765.24	857.418	22.6159	389.662	9.00636	2.9365	0.0304236	6.74813	0.101762	0.0370951	0	0.00437486	0.00258825	0.0411381	0.208091	0.0657628	0.484845	0.106197	1.16323	0.253535	0.758777	0.148115	0.794545	0.134041	0.0713334
			7	7.02745	61.7533	756.956	226.532	7482.34	766.784	18.798	327.757	4.66614	2.48865	0.0263641	7.24697	0.161388	0.0324717	0.00416797	0.00183256	0.0048819	0.0643725	0.190247	0.0822154	0.331932	0.130076	1.02973	0.249165	0.822781	0.114939	0.836537	0.10871	0.0465324
			8	9.28465	55.5937	639.164	223.421	7325.09	804.366	19.2567	352.753	6.07712	2.76306	0.0432038	6.13971	0.100585	0.0300895	0	0.00161193	0.00345061	0.0809403	0.177453	0.0649935	0.429827	0.115661	0.99935	0.245113	0.69202	0.125236	0.855386	0.111275	0.0435211
			Average	5.03037	57.5958	676.883	225.59	7757.99	798.759	20.3677	352.039	7.14555	2.63334	0.0449461	6.44668	0.0782371	0.0300273	0.00066813	0.00309294	0.00423401	0.0595258	0.148164	0.0684801	0.43443	0.117102	1.01156	0.244422	0.753855	0.128426	0.814266	0.101054	0.0538551
			S. D.	2.60932	2.06767	43.1461	6.71282	564.404	53.5221	2.34034	31.8106	2.85969	0.294714	0.0210868	0.409269	0.0475855	0.00653382	0.00147291	0.00268088	0.00295936	0.0273907	0.0462895	0.00605813	0.0650886	0.0112611	0.0813521	0.0126932	0.0489957	0.0102678	0.0585261	0.0166277	0.0230694
1830	Harzburgite	Normal	1	3.68568	55.3704	667.957	223.066	5944.22	695.241	21.3479	390.774	5.99859	2.34423	0.0785994	6.61748	0.173382	0.0235291	0	0.00893279	0.00110115	0.0561725	0.152665	0.0509299	0.340885	0.129579	1.06619	0.232726	0.859873	0.101254	0.814835	0.114778	0.0357619
			2	5.8914	54.6856	644.147	221.483	5906.22	699.333	19.801	382.552	5.62641	2.32204	0.0872959	6.31896	0.0625529	0.0286866	0	0	0.00573338	0.085981	0.141402	0.0767246	0.496776	0.126567	1.07125	0.238364	0.837587	0.102789	0.795829	0.127577	0.0657997
			3	6.78927	58.8788	679.807	217.913	5936.64	669.435	18.7525	370.061	4.65825	2.06375	0.111271	6.4186	0.16271	0.0257553	0.00019699	0	0.00404239	0.0843659	0.116604	0.0691119	0.459177	0.122094	0.979066	0.238473	0.835754	0.114796	0.765163	0.110385	0.0423534
			4	5.44439	54.873	645.918	214.837	5893.33	639.941	18.7455	370.022	4.94386	2.2535	0.0480092	6.58928	0.143566	0.0248597	0.00149279	0.000382309	0	0.0803058	0.14843	0.0841146	0.422402	0.124904	0.981969	0.220092	0.907842	0.125845	0.741954	0.109465	0.0409052
			5	7.42387	59.1709	722.507	228.125	6220.48	714.508	19.801	384.306	4.71741	2.31016	0.0649395	6.78605	0.104865	0.0194734	0.000376097	0	0.00329983	0.0835162	0.135736	0.0866779	0.607325	0.118752	1.12893	0.238576	0.844002	0.1248	0.894972	0.126116	0.0365437
			6	8.38492	57.6728	707.308	232.575	6579.93	705.928	23.351	439.063	16.1467	2.70407	0.0887412	6.94618	0	0.0223612	0	0.00360345	0.00585116	0.122383	0.163038	0.0850633	0.415321	0.125367	1.1119	0.26659	0.864244	0.107829	0.829245	0.116948	0.0502191
			Average	6.26992	56.7753	677.941	223	6080.14	687.398	20.2998	389.463	7.0152	2.33296	0.0798093	6.61276	0.107846	0.0241109	0.000344313	0.00215309	0.00333798	0.0854541	0.142979	0.075437	0.456981	0.124544	1.05655	0.239137	0.858217	0.112886	0.807	0.117545	0.0452638
			S. D.	1.64789	2.04589	31.9977	6.52325	273.387	27.7746	1.77289	25.6541	4.50492	0.20846	0.0217231	0.230558	0.0667413	0.00313394	0.000582645	0.00360863	0.00239571	0.0212269	0.0159779	0.0136864	0.0901127	0.0037364	0.0635251	0.0152238	0.0269593	0.0107365	0.0536682	0.00772858	0.0113144
1825	Harzburgite	Metasomatic	1	4.03813	61.0932	1671.59	202.994	9154.98	708.518	18.2921	318.616	6.63153	2.42752	0.417188	6.57058	2.85311	0.0208242	0	0.00388695	0.000397678	0.0419589	0.22047	0.133436	0.983575	0.190449	1.42445	0.255961	0.575903	0.0964586	0.587121	0.0730392	0.336118
			2	8.66638	72.3802	1888.11	227.397	8628.09	796.73	21.0818	373.992	10.3285	2.66965	0.386172	6.75535	3.28127	0.0181909	0	0.00103908	0.00254989	0.0952758	0.271913	0.132483	0.904739	0.193291	1.35787	0.280084	0.720604	0.0784246	0.507293	0.0669101	0.4056
			3	4.58716	69.9285	1917.72	215.476	9198.8	714.011	18.5544	320.882	5.7013	2.79098	0.347337	7.24271	3.79859	0.0280483	0.00447099	0.00230129	0.00170776	0.0691188	0.298386	0.172663	0.992879	0.197249	1.46934	0.278083	0.826852	0.0992451	0.542714	0.0717673	0.367975
			4	5.09183	67.9203	2299.12	226.505	9661.83	729.298	20.254	366.84	8.68361	2.88417	0.305421	8.38028	4.14666	0.0402817	0.00216093	0.00294981	0	0.0609842	0.322312	0.22528	1.04822	0.243134	1.67539	0.33477	0.69916	0.101651	0.58861	0.0747185	0.404622
			5	4.88338	73.1604	2217.09	230.211	9570.95	742.322	21.572	355.368	9.26039	3.04098	0.489668	8.27445	4.00933	0.0292895	0	0.00107749	0	0.0706998	0.374451	0.219381	1.0145	0.263687	1.5978	0.322368	0.773224	0.116778	0.648501	0.0593862	0.384214
			6	4.98261	76.556	2410.55	239.767	10009.5	985.666	23.6578	372.546	42.9206	3.18772	0.465216	7.71629	4.22789	0.0455893	0.00333939	0.00684292	0	0.0874197	0.384464	0.202907	1.06115	0.21639	1.50635	0.286273	0.69241	0.10112	0.48802	0.0628652	0.485534
			7	7.69185	70.8495	1418.05	188.105	7075.89	635.714	17.7194	340.558	9.1692	2.38152	0.257791	6.08317	2.90613	0.0329103	0.0027553	0.00245437	0.00413575	0.0680905	0.239622	0.129931	0.679081	0.166849	1.1129	0.207477	0.582624	0.0891823	0.443655	0.0561329	0.35108
			Average	5.70591	70.2697	1974.6	218.637	9042.87	758.894	20.1616	349.829	13.2422	2.76893	0.381256	7.28897	3.60328	0.0307335	0.00181809	0.00293599	0.00125587	0.0705068	0.30166	0.173726	0.954877	0.21015	1.44916	0.280717	0.695825	0.0975514	0.543702	0.0664028	0.390735
			S. D.	1.7473	4.87355	357.408	17.8231	972.487	110.855	2.12565	23.5163	13.1852	0.299907	0.0839274	0.875752	0.583223	0.00984386	0.00183777	0.00199398	0.00161455	0.017383	0.0631371	0.0424994	0.131913	0.0334339	0.182103	0.0421737	0.0921875	0.0118262	0.0699063	0.00718152	0.0491882
1826	Harzburgite	Metasomatic	1	9.16901	73.735	1075.53	174.568	9860.3	757.072	16.884	307.12	9.63032	1.84111	0.556763	10.379	8.20179	0.0372679	0	0.00870516	0.0174012	0.341044	0.851891	0.361569	1.70044	0.302863	2.05173	0.389194	0.906488	0.103642	0.54379	0.0936169	0.583774
			2	3.98542	85.0265	1763.76	192.615	9237.18	701.405	15.9465	281.828	7.20387	2.0921	0.584654	12.5218	9.50636	0.0343501	0.00361697	0.0102665	0.0131035	0.366538	1.01782	0.441913	1.71247	0.316078	2.42882	0.438872	1.16519	0.135295	0.810816	0.111012	0.600134
			3	4.52617	82.9804	2043.34	194.738	10413.6	718.318	18.1695	305.258	9.58911	2.14439	0.757529	13.0961	11.3908	0.0514519	0.00143975	0.0123913	0.0128875	0.455338	0.962132	0.439466	2.02313	0.349865	2.39909	0.453885	1.16572	0.142547	0.863105	0.0952049	0.744673
			4	5.5649	72.6405	2159.56	190.545	9745.31	737.699	18.674	320.88	6.58339	2.44649	0.440432	15.2334	11.9987	0.0390423	0	0.00989471	0.0168412	0.438264	1.2584	0.521837	2.5594	0.426721	3.04276	0.556098	1.29406	0.148498	0.711391	0.0978417	0.761768
			5	6.33682	88.6425	1850.23	193.164	10350.3	656.967	17.9096	328.995	6.9023	1.97991	0.525966	13.42	10.997	0.0378185	0.00604771	0.0114246	0.00987706	0.372327	1.09088	0.507078	2.05571	0.420681	2.66812	0.568817	1.3081	0.171987	0.820941	0.0957404	0.721557
			6	3.95966	87.0043	1695.42	187.184	9942.74	720.224	18.6321	323.257	6.8029	1.91044	0.61525	14.2226	10.696	0.0431596	0	0.0109047	0.0104943	0.45534	1.03991	0.563641	2.2771	0.438015	2.93213	0.558946	1.25738	0.168017	0.814092	0.0870201	0.643966
			7	3.59696	78.1432	1676.72	185.184	10790.2	648.154	17.5016	318.619	6.65274	1.96804	0.412019	11.9374	10.1325	0.0550698	0	0.000768012	0.0106533	0.310414	0.871902	0.458147	1.85819	0.371956	2.38548	0.453142	1.08633	0.13943	0.725099	0.0741414	0.75937
			Average	5.30556	81.1675	1752.08	188.285	10048.5	705.691	17.6739	312.279	7.62352	2.05464	0.556088	12.9729	10.4176	0.0425943	0.00158635	0.00919357	0.0130369	0.391324	1.01328	0.470522	2.02664	0.375168	2.5583	0.488422	1.16904	0.144202	0.755605	0.093511	0.687892
			S. D.	1.96375	6.39297	348.152	6.93166	511.744	40.2868	0.988002	15.9021	1.37142	0.201027	0.115423	1.57537	1.27029	0.00781213	0.00238449	0.00389449	0.00304625	0.0583793	0.138735	0.0663921	0.311154	0.0548468	0.345231	0.071596	0.140577	0.022758	0.108047	0.0111819	0.0768069
1827	Harzburgite	Metasomatic	1	5.51984	76.9457	1289.99	183.334	10884.7	690.136	20.8895	384.675	7.49121	2.26911	3.32285	12.5206	28.6871	0.0369253	0.0108691	0.149469	0.151136	2.85061	3.03846	1.27858	4.0211	0.643587	3.11496	0.489713	1.1231	0.126023	0.636511	0.082244	1.3482
			2	5.31231	74.2049	1366.98	176.781	10865.2	685.566	20.597	365.163	7.57428	2.37612	3.44525	12.9934	29.0165	0.0502015	0.00290396	0.180969	0.170038	2.96482	3.09691	1.3208	4.00613	0.672286	3.33634	0.560946	1.13698	0.134918	0.616302	0.0857827	1.1395
			3	5.47799	83.721	968.133	160.959	8785.56	655.096	17.1157	327.368	5.79555	1.73142	3.09881	10.971	24.7017	0.028387	0.00568974	0.131698	0.133056	2.45698	2.77477	1.02756	3.55014	0.532896	2.746	0.459611	0.988648	0.0988479	0.542115	0.075266	1.09528
			4	3.69377	80.3851	1107.78	170.263	9990.57	684.985	20.0912	351.076	6.78685	2.10944	3.26449	11.906	25.7575	0.0241779	0.0133498	0.137107	0.168702	2.71359	2.94963	1.14685	3.93151	0.561757	3.04552	0.474596	1.07742	0.126787	0.615454	0.081911	1.17442
			5	5.41866	83.3013	1691.72	206.484	12486.6	828.527	20.8652	356.825	7.66244	2.39944	3.34034	14.3004	27.8073	0.0366872	0.0156985	0.127171	0.151404	2.64273	3.02168	1.32983	4.23602	0.568256	3.38935	0.547276	1.02918	0.150105	0.654442	0.0825649	1.31959
			6	4.75605	81.605	1588.23	199.746	11913.5	790.833	19.4248	331.078	7.26114	2.29743	3.44845	14.1469	26.4274	0.0426778	0.0156139	0.133692	0.136366	2.41761	2.90155	1.15001	4.18109	0.601136	3.19785	0.534087	1.09807	0.14244	0.619572	0.0907546	1.25361
			7	5.4013	86.5547	1341.63	204.697	11499.3	805.77	21.0981	368.316	11.2951	2.24455	2.90138	12.873	23.3747	0.0361543	0.00313417	0.119913	0.107882	1.89823	2.50805	1.00411	3.1749	0.493642	2.91431	0.472287	0.90314	0.135119	0.56808	0.115739	1.00617
			8	5.00565	80.0906	1028.08	177.403	10456.2	726.805	18.9094	335.967	7.03355	1.79983	2.3282	11.1101	18.8665	0.0389047	0.00829672	0.100956	0.0823967	1.52674	2.27474	0.853115	2.86939	0.401492	2.35304	0.421191	0.865447	0.096785	0.534036	0.0964312	0.981787
			9	5.003	73.9127	1490.31	178.727	10430.3	746.078	17.5634	333.51	5.93631	1.89807	2.71667	13.5909	24.9913	0.0231174	0	0.111344	0.138754	2.68717	3.10723	1.23967	4.08576	0.553281	3.06189	0.497086	1.08139	0.116071	0.678785	0.0903436	1.04217
			Average	5.0654	80.0801	1319.2	184.266	10812.4	734.866	19.6171	350.442	7.42627	2.12504	3.09627	12.7125	25.5144	0.0352481	0.00839511	0.13248	0.137748	2.46205	2.85256	1.15006	3.784	0.558704	3.0177	0.495199	1.03371	0.125233	0.607255	0.0890041	1.15119
			S. D.	0.576615	4.33517	249.19	15.9087	1092.68	61.6493	1.48188	19.8519	1.60155	0.253858	0.380302	1.21156	3.12626	0.00876541	0.00582836	0.023157	0.0281673	0.467047	0.286828	0.162214	0.479918	0.0803516	0.318312	0.0451023	0.0964316	0.0183667	0.0495463	0.0117864	0.133732
1829a	Harzburgite	Metasomatic	1	4.82507	101.143	1127.9	235.757	13727.6	666.286	20.2731	362.301	8.87371	2.23201	13.3554	13.503	43.1265	0.0627208	0.0372285	0.598771	0.367897	4.76775	3.55719	1.35489	4.16328	0.72264	3.52297	0.549504	1.3408	0.124206	0.595905	0.0832442	1.48702
			2	3.74071	84.5407	1148.97	217.186	11018.4	714.691	20.6616	356.851	8.49853	2.20939	15.853	13.148	42.6538	0.0570115	0.0511722	0.781044	0.51199	6.1792	4.25376	1.67919	4.69207	0.73764	3.38398	0.52069	1.12671	0.123204	0.595074	0.0682841	1.58096
			3	3.7224	91.8877	1147.74	228.152	11110.1	750.421	21.6365	362.655	9.01004	2.14708	18.8628	12.7171	41.5556	0.0475727	0.052704	0.960109	0.588509	6.55154	4.2141	1.74405	4.50442	0.718687	3.44116	0.522265	1.10116	0.115942	0.556832	0.0772608	1.5587
			4	3.46573	129.237	1091.6	242.079	10428.9	808.351	26.5442	446.354	10.058	1.76858	14.2893	13.3196	36.6537	0.0523162	0.0437968	0.577157	0.376037	4.60316	2.94639	1.23446	3.70392	0.601354	3.14568	0.525181	1.31702	0.149795	0.676792	0.109372	1.2563
			5	1.97782	102.265	1011.11	221.902	10771.6	661.134	18.1827	320.494	6.68623	1.77381	12.2345	12.6117	36.1485	0.0443041	0.0381665	0.580119	0.368696	4.36629	3.46022	1.27342	3.57438	0.632025	3.40601	0.507639	1.21851	0.135798	0.683502	0.0816613	1.34852
			6	3.33929	90.8269	1013.19	217.688	10761.1	721.543	21.6749	355.184	7.88464	2.27065	21.7793	12.4799	42.4941	0.0619689	0.0483021	0.895744	0.508597	6.10559	3.80269	1.55232	4.09011	0.65043	3.16405	0.505537	1.07759	0.119112	0.514914	0.0698605	1.40789
			7	8.58387	104.129	715.859	232.506	11853.3	730.367	21.5664	368.393	21.1034	1.72199	11.9203	9.37365	32.0732	0.045752	0.0368285	0.435126	0.258964	3.41817	2.39006	0.975825	2.91857	0.442234	2.48708	0.399265	0.942549	0.0946837	0.482187	0.0628193	1.19935
			8	5.90959	80.6097	1184.87	213.192	11195.2	725.957	20.0406	345.687	8.25767	2.1525	18.3552	12.9004	40.4218	0.0500419	0.042371	0.865649	0.526741	6.62472	4.3089	1.60183	4.86764	0.735367	3.62025	0.515307	1.23792	0.101918	0.619601	0.0700307	1.41964
			9	4.00448	100.729	902.667	229.038	12519.4	761.993	21.0095	360.098	8.20059	1.94755	15.5782	13.5795	38.0376	0.0480358	0.0473136	0.663505	0.372921	4.77309	3.22656	1.31054	4.08873	0.587278	2.92087	0.541598	0.902447	0.108974	0.52649	0.0678668	1.19465
			Average	4.39655	98.3743	1038.21	226.389	11487.3	726.749	21.2877	364.224	9.84142	2.02484	15.8031	12.6259	39.2405	0.0521915	0.0442092	0.706358	0.43115	5.2655	3.57332	1.41406	4.06701	0.647517	3.23245	0.509665	1.14052	0.119292	0.583477	0.076711	1.38367
			S. D.	1.89998	14.2301	150.13	9.59283	1050.32	45.5642	2.25487	33.871	4.31994	0.222211	3.31166	1.28037	3.76101	0.00686124	0.00602393	0.177065	0.106308	1.12872	0.651319	0.247957	0.60485	0.0966292	0.352899	0.0438307	0.153462	0.0168355	0.0700218	0.014	0.145464
1813b	Harzburgite	Hydrous	1	5.94491	64.9387	176.644	139.961	4664.59	567.781	15.8235	306.936	4.41426	0.817758	0.666439	1.52518	0.02996	0.0204608	0.0223901	0.050552	0.0127911	0.0574594	0.0236172	0.00742376	0.085544	0.0151135	0.171748	0.0577345	0.277544	0.0481721	0.392417	0.0474407	0
			2	4.77021	65.6518	155.484	124.816	3871.03	570.888	15.4535	305.136	3.53802	0.926721	0.787587	1.42816	0.0035145	0.0116628	0.0228596	0.0566409	0.0158486	0.0780024	0.0375476	0.0110764	0.0294655	0.0178206	0.185921	0.0699673	0.253599	0.0532589	0.340578	0.0545629	0.00325613
			3	5.9596	60.1116	163.807	132.465	4655.24	597.766	17.9092	308.408	14.8184	1.16795	0.75635	1.3438	0.0435844	0.00939514	0.0194659	0.0504005	0.0097504	0.0931046	0.026581	0.0141728	0.0277325	0.0184427	0.114816	0.0558015	0.244861	0.0477144	0.272144	0.0604199	0.00569033
			4	5.00323	58.9502	166.019	146.903	5478.05	682.36	19.0159	350.236	5.79781	1.1103	0.79132	1.6008	0.0462217	0.0157716	0.019576	0.0670816	0.0142664	0.124336	0.0538988	0.0104099	0.072347	0.0157712	0.204406	0.06383	0.261652	0.0498592	0.370152	0.0630873	0
			5	4.88659	56.2278	172.324	148.073	5767.33	627.992	18.7436	363.267	4.73259	1.16315	0.706831	1.55481	0.0297524	0.0202306	0.0180318	0.053424	0.0128172	0.0874699	0.0448354	0	0	0.0165628	0.207024	0.0603721	0.25906	0.0435311	0.404692	0.0653491	0.00662267
			Average	5.31291	61.176	166.856	138.444	4887.25	609.357	17.3891	326.796	6.66022	1.03718	0.741705	1.49055	0.0306066	0.0155042	0.0204647	0.0556198	0.0130947	0.0880744	0.037296	0.00861657	0.0430178	0.0167422	0.176783	0.0615411	0.259343	0.0485071	0.355996	0.058172	0.00311383
			S. D.	0.589452	4.02376	8.13998	9.84931	751.614	47.4856	1.65448	27.7543	4.63163	0.157053	0.0539963	0.103575	0.0169365	0.00497633	0.00207055	0.00689495	0.00225335	0.0243889	0.0125944	0.00538066	0.0351302	0.00138584	0.0375043	0.00559108	0.0120354	0.00353234	0.0528373	0.00722686	0.00309687
1814b	Harzburgite	Hydrous	1	4.18282	61.5428	265.593	143.359	4981.63	652.95	18.4507	328.926	6.17036	1.00118	0.969386	1.76023	0.00612477	0.0159736	0.0106986	0.0553147	0.00903231	0.066579	0.0629471	0.0133416	0	0.0218442	0.238753	0.0715907	0.281666	0.058845	0.357064	0.0556099	0
			2	4.58526	57.936	222.672	111.878	3414.2	585.51	16.6889	312.797	3.94431	0.623884	0.779673	1.51436	0.0597991	0.0056854	0.0110174	0.0301116	0.00334421	0.0793623	0.0223795	0.0192073	0.0869801	0.0121491	0.192235	0.0558171	0.270591	0.0513131	0.316556	0.0445001	0.00946675
			3	4.10149	58.2526	239.568	125.047	3812.84	576.728	16.7784	299.646	4.0331	0.887286	0.832033	1.62859	0.0132353	0.0143535	0.0208964	0.04077	0.00937588	0.0262757	0.0475438	0.0219861	0.0652493	0.0175054	0.233665	0.0649904	0.27419	0.0556975	0.377176	0.0596727	0.00485639
			4	4.76322	57.6957	254.681	134.368	4573.78	597.958	16.8087	305.099	4.52228	1.0052	0.890278	1.63711	0	0.0298527	0.00485912	0.0424228	0.0177136	0.0745179	0.00422659	0	0	0.0213796	0.211201	0.0768641	0.306085	0.0655913	0.356066	0.0620965	0
			Average	4.4082	58.8568	245.628	128.663	4195.61	603.286	17.1817	311.617	4.66752	0.879388	0.867842	1.63507	0.0197898	0.0164663	0.0118679	0.0421548	0.0098665	0.0616837	0.0342743	0.0136337	0.0380574	0.0182196	0.218963	0.0673156	0.283133	0.0578617	0.351715	0.0554698	0.00358078
			S. D.	0.317414	1.80516	18.657	13.4578	711.324	34.2355	0.847584	12.7382	1.03363	0.178892	0.0813853	0.100469	0.0272156	0.0100022	0.00665149	0.0103313	0.00591759	0.0241864	0.0260932	0.00977737	0.0448314	0.00449016	0.0214666	0.0090751	0.0159815	0.00600785	0.0253772	0.00778738	0.00454297
1813c	Harzburgite	Hydrous	1	6.82416	59.3153	195.732	93.5818	4842.79	629.58	17.9294	349.612	5.4078	0.716913	1.36988	2.29918	0.313608	0.0134355	0.00682388	0.0427678	0.0162879	0.167289	0.0614049	0.0237087	0.0274764	0.045186	0.281592	0.0850145	0.295942	0.0574772	0.338652	0.0552802	0.0119406
			2	3.57328	58.9222	208.622	96.3027	5138.81	587.391	16.5777	320.069	4.61057	0.780857	1.20738	2.54403	0.311045	0.0279741	0.00487099	0.0483342	0.0203052	0.144359	0.10402	0.0357638	0.142136	0.0377853	0.355219	0.0928704	0.371753	0.0643922	0.466248	0.0617091	0.0348333
			3	5.1174	56.6211	201.153	101.038	5466.69	652.091	18.1433	351.026	5.32185	0.847946	1.38235	2.53655	0.330515	0.0237573	0.015706	0.0430554	0.0154123	0.142066	0.0873482	0.0171026	0.230079	0.0444715	0.400346	0.0965874	0.418273	0.0562171	0.520274	0.0663573	0.0214738
			4	5.84355	63.6494	211.972	94.8363	4340.14	579.015	16.8818	316.135	4.56374	0.682775	1.24999	2.45818	0.280982	0.0120117	0.00212639	0.0372781	0.0171832	0.127592	0.08321	0.0310303	0.0828707	0.0459272	0.387943	0.0978929	0.353021	0.0641264	0.350961	0.0559687	0.0104274
			5	4.74935	66.678	230.354	104.364	3886.25	675.235	17.9626	323.166	4.88882	0.733759	1.15689	2.47859	0.324109	0.0104394	0.00982147	0.0604726	0.0198224	0.173493	0.140133	0.0223558	0.167301	0.0383877	0.389171	0.101447	0.328345	0.0552741	0.385672	0.052757	0.0270233
			6	3.47573	59.0158	208.127	93.8092	4176.14	638.192	16.438	313.654	4.6808	0.907882	1.31131	2.55108	0.324905	0.0195914	0.0117813	0.0547662	0.0214975	0.15421	0.0945236	0.00699357	0.0931851	0.0436674	0.333324	0.0749402	0.349295	0.0468654	0.382985	0.0522888	0.0236348
			7	3.03214	62.027	211.283	93.916	4247.75	564.089	15.1025	288.101	4.67047	0.743463	1.36096	2.29493	0.303246	0.0156414	0.0149563	0.0644827	0.0180442	0.10194	0.0599157	0.00616691	0.0793461	0.038437	0.337826	0.0783733	0.313385	0.0526064	0.383969	0.0572476	0.0177945
			Average	4.65937	60.8898	209.606	96.8354	4585.51	617.942	17.005	323.109	4.87772	0.773371	1.29125	2.45179	0.31263	0.0175501	0.00944091	0.0501653	0.0183647	0.144421	0.0900794	0.020446	0.117485	0.0419803	0.35506	0.0895894	0.347145	0.0567084	0.404109	0.0573727	0.0210182
			S. D.	1.38654	3.42772	10.8474	4.22064	574.406	41.5191	1.09589	21.8121	0.348816	0.0791301	0.0880651	0.11121	0.0168099	0.00649569	0.00510765	0.010059	0.00224474	0.0243494	0.027405	0.0112324	0.0672204	0.00360475	0.0417587	0.010252	0.0404533	0.00620039	0.065392	0.00505046	0.0085531
1810	Harzburgite	Hydrous	1	4.64746	60.1901	209.599	114.932	2567.29	610.306	16.1554	273.843	4.46974	0.614305	0.115625	1.32036	0.00528453	0.0100316	0.00401313	0.0193427	0.00161007	0.0456699	0	0	0.0788085	0.0165484	0.132737	0.0556128	0.19455	0.0414244	0.310919	0.051415	0
			2	4.2693	49.1101	201.71	123.233	4070.37	734.235	19.8138	331.778	5.7912	0.999528	0.675	1.21546	0.0106964	0.0104858	0.00646217	0.0302169	0.0088428	0.0301545	0	0.0137985	0.0108401	0.00838655	0.173636	0.0437225	0.213031	0.0372057	0.311115	0.0512444	0
			3	3.93409	47.8866	202.633	119.495	3801.43	719.015	19.3319	325.363	5.55451	0.975413	0.585724	1.18819	0.0176766	0.0037841	0.00589857	0.0322131	0.00684579	0	0.0107437	0.00428993	0.0249427	0.0119427	0.121946	0.0533139	0.225665	0.0378837	0.281096	0.0505272	0.00666535
			4	5.06419	54.3953	225.939	117.311	3351.17	604.688	15.6535	269.62	4.66611	0.860478	0.515243	1.21101	0.0275302	0.0127739	0.00964275	0.0256151	0.00432238	0.0211794	0.00720182	0	0.0111371	0.0121127	0.152314	0.0563634	0.227187	0.0424024	0.247176	0.0344596	0
			5	3.47244	54.4045	223.424	125.127	4146.96	634.907	16.2707	271.973	5.04686	0.870461	0.491257	1.28122	0.0209195	0.0151796	0.00140805	0.0206551	0.0060754	0.0341013	0.016656	0.0257083	0.0613305	0.0119837	0.198444	0.0668662	0.225269	0.0326136	0.255925	0.0470883	0
			6	5.60962	50.49	228.583	121.23	4696.62	610.39	17.0351	325.469	5.1838	0.942103	0.560463	1.43056	0.0338565	0.0303315	0.0131136	0.0131619	0.00783152	0.0222476	0	0.00595255	0.0193514	0.00897718	0.161893	0.0636726	0.192135	0.038776	0.348588	0.0385601	0
			7	7.01721	50.0857	222.217	129.751	5323.86	693.298	17.8498	332.972	6.79148	1.23351	0.674219	1.52789	0.0105611	0.0186964	0.0160184	0.0218871	0.00756193	0.0427016	0.00589012	0.00275394	0.0530544	0.0193584	0.191859	0.069488	0.23272	0.054045	0.344564	0.0585233	0
			8	3.03582	56.3291	228.964	118.915	4267.8	582.613	15.678	285.77	5.10764	0.801072	0.461122	1.43875	0	0.016922	0.00697085	0.0285098	0.00622733	0.0151437	0	0.00267085	0.0411637	0.00596202	0.130295	0.0537228	0.218684	0.0397278	0.354355	0.0475385	0.0120157
			9	3.48614	61.5053	226.243	115.581	3597.12	578.115	15.6342	281.067	5.10714	0.812543	0.408355	1.36358	0.0127955	0.00612711	0.0102154	0.0070474	0	0.0148752	0.00705932	0	0.0276697	0.00767654	0.169017	0.0537594	0.204593	0.0417856	0.286144	0.043202	0.0100899
			Average	4.50403	53.8219	218.812	120.619	3980.29	640.841	17.0469	299.762	5.30206	0.901046	0.498556	1.33078	0.01548	0.0138147	0.00819366	0.0220721	0.00547969	0.0251193	0.00528343	0.00613045	0.0364776	0.0114387	0.159127	0.0573913	0.21487	0.0406516	0.304432	0.046951	0.00319677
			S. D.	1.25043	4.86095	11.0485	4.79261	791.207	59.2795	1.60977	28.1557	0.686789	0.169587	0.169531	0.118366	0.0106957	0.00786085	0.00454012	0.00819908	0.00296432	0.0145632	0.00589502	0.00852662	0.0237426	0.00432086	0.0271333	0.00798347	0.014783	0.00584005	0.0397643	0.00729665	0.00498291
1813b	Harzburgite	Hydrous	1	5.94491	64.9387	176.644	139.961	4664.59	567.781	15.8235	306.936	4.41426	0.817758	0.666439	1.52518	0.02996	0.0204608	0.0223901	0.050552	0.0127911	0.0574594	0.0236172	0.00742376	0.085544	0.0151135	0.171748	0.0577345	0.277544	0.0481721	0.392417	0.0474407	0
			2	4.77021	65.6518	155.484	124.816	3871.03	570.888	15.4535	305.136	3.53802	0.926721	0.787587	1.42816	0.0035145	0.0116628	0.0228596	0.0566409	0.0158486	0.0780024	0.0375476	0.0110764	0.0294655	0.0178206	0.185921	0.0699673	0.253599	0.0532589	0.340578	0.0545629	0.00325613
			3	5.9596	60.1116	163.807	132.465	4655.24	597.766	17.9092	308.408	14.8184	1.16795	0.75635	1.3438	0.0435844	0.00939514	0.0194659	0.0504005	0.0097504	0.0931046	0.026581	0.0141728	0.0277325	0.0184427	0.114816	0.0558015	0.244861	0.0477144	0.272144	0.0604199	0.00569033
			4	5.00323	58.9502	166.019	146.903	5478.05	682.36	19.0159	350.236	5.79781	1.1103	0.79132	1.6008	0.0462217	0.0157716	0.019576	0.0670816	0.0142664	0.124336	0.0538988	0.0104099	0.072347	0.0157712	0.204406	0.06383	0.261652	0.0498592	0.370152	0.0630873	0
			5	4.88659	56.2278	172.324	148.073	5767.33	627.992	18.7436	363.267	4.73259	1.16315	0.706831	1.55481	0.0297524	0.0202306	0.0180318	0.053424	0.0128172	0.0874699	0.0448354	0	0	0.0165628	0.207024	0.0603721	0.25906	0.0435311	0.404692	0.0653491	0.00662267
			Average	5.31291	61.176	166.856	138.444	4887.25	609.357	17.3891	326.796	6.66022	1.03718	0.741705	1.49055	0.0306066	0.0155042	0.0204647	0.0556198	0.0130947	0.0880744	0.037296	0.00861657	0.0430178	0.0167422	0.176783	0.0615411	0.259343	0.0485071	0.355996	0.058172	0.00311383
			S. D.	0.589452	4.02376	8.13998	9.84931	751.614	47.4856	1.65448	27.7543	4.63163	0.157053	0.0539963	0.103575	0.0169365	0.00497633	0.00207055	0.00689495	0.00225335	0.0243889	0.0125944	0.00538066	0.0351302	0.00138584	0.0375043	0.00559108	0.0120354	0.00353234	0.0528373	0.00722686	0.00309687

## Sheet: Amp trace element compositions
Data 2-2 Trace element compositions of amphibole (ppm) from the Luobusa metasomatized mantle peridotites
Sample	Lithology	Group	Li	Sc	Ti	V	Cr	Mn	Co	Ni	Zn	Ga	Sr	Y	Zr	Nb	La	Ce	Pr	Nd	Sm	Eu	Gd	Tb	Dy	Ho	Er	Tm	Yb	Lu	Hf	Ta
1827	Harzburgite	Metasomatic	8.49761	74.1126	7635.8	273.986	12443.2	507.435	38.2315	878.391	12.6409	6.52397	6.08778	16.1732	49.7832	1.58583	0.00158859	0.235391	0.211979	3.67123	3.911	1.71345	4.90804	0.803397	3.85536	0.629998	1.44409	0.147972	0.682109	0.102448	1.79996	0.130616
			16.3453	66.8999	8367.3	290.165	15799.5	574.861	40.7102	1000.65	20.2737	5.5593	5.57322	16.6257	42.2106	1.62209	0.0110912	0.212283	0.210624	3.35046	3.63404	1.51332	4.99656	0.774244	3.86681	0.673645	1.54268	0.169972	0.802462	0.129879	1.66585	0.134084
			5.84081	79.7092	7462.23	282.492	16123.1	601.319	37.1839	778.406	15.676	5.70927	5.67057	16.5354	40.1967	0.913887	0.00341027	0.180577	0.22001	3.35036	3.81849	1.55353	4.81949	0.783836	3.84367	0.653929	1.53806	0.193926	0.770016	0.112259	1.53089	0.0835885
			7.83082	81.6284	8179.69	319.367	19024.7	520.197	35.723	911.436	11.5893	5.71778	5.49373	17.5675	38.1583	0.793284	0.00894283	0.169442	0.179505	3.22355	3.39665	1.52266	4.85803	0.75086	4.1754	0.705418	1.65673	0.18512	0.803657	0.126338	1.57285	0.0569232
		Average	9.62863	75.5875	7911.26	291.502	15847.6	550.953	37.9621	892.221	15.045	5.87758	5.70632	16.7254	42.5872	1.22877	0.00625821	0.199423	0.205529	3.3989	3.69005	1.57574	4.89553	0.778084	3.93531	0.665748	1.54539	0.174247	0.764561	0.117731	1.64239	0.101303
		SD	4.61781	6.61141	431.093	19.7169	2693.37	44.5275	2.10112	91.781	3.89268	0.437029	0.264388	0.594424	5.07457	0.43627	0.00449002	0.0300726	0.0178372	0.191149	0.226964	0.0934002	0.0764883	0.0218305	0.160341	0.0319053	0.0870199	0.0201176	0.0571347	0.012717	0.119229	0.0374933
1825	Harzburgite	Metasomatic	5.54742	103.34	11581.4	450.024	15208.6	570.27	36.0819	929.986	14.2009	6.33136	0.500197	15.5027	5.95098	0.065993	0.0101495	0.0204473	0.00781801	0.11363	0.370391	0.26594	1.42178	0.369915	2.83237	0.611059	1.51786	0.184561	1.27237	0.159775	0.577058	0.00324273
			3.91603	85.5533	8420.74	366.025	14215.7	494.231	37.6964	959.66	11.0021	7.94361	0.755514	13.62	6.27497	0.0728586	0.00629626	0.00362755	0.0043996	0.0380725	0.416628	0.332707	1.57159	0.343062	2.66352	0.523248	1.32092	0.181274	0.961993	0.151916	0.428313	0.00700422
			5.14701	131.621	8624.41	461.214	17386.1	1057.03	50.3134	1221.55	29.5911	9.07331	0.596629	16.7671	7.6243	0.0574628	0.00755347	0	0.00429042	0.0580084	0.460781	0.273983	1.60987	0.450264	2.76557	0.658343	1.91581	0.235055	1.57659	0.217793	0.563378	0.00671941
		Average	4.87016	106.838	9542.19	425.754	15603.5	707.176	41.3639	1037.06	18.2647	7.78276	0.617447	15.2966	6.61675	0.0654381	0.00799975	0.00802496	0.00550267	0.0699038	0.415933	0.290877	1.53441	0.387747	2.75382	0.59755	1.58486	0.200296	1.27032	0.176495	0.522917	0.00565545
		SD	0.850205	23.2322	1768.96	52.0292	1621.67	305.355	7.79243	160.454	9.9385	1.37803	0.128925	1.58364	0.887471	0.00771288	0.00196502	0.0109099	0.00200588	0.0391583	0.045199	0.0364487	0.0994005	0.0557813	0.0850366	0.0685528	0.303056	0.0301466	0.307305	0.0359803	0.082214	0.00209432
1826	Harzburgite	Metasomatic	17.1424	94.353	11188	365.655	17211	665.524	36.5682	996.145	14.3268	5.70972	1.25466	20.6019	15.1911	0.0708394	0.00285801	0.0165502	0.0277607	0.614092	1.70803	0.71995	3.41137	0.594725	4.00873	0.81078	1.93395	0.216309	1.18442	0.14535	0.895033	0
			10.1463	86.206	10960.8	355.112	18005.5	627.009	36.0741	900.314	12.0211	6.10841	1.03158	23.1469	17.541	0.0534543	0.00353517	0.0239735	0.0260266	0.611001	1.64416	0.809329	3.67129	0.732831	4.61472	0.86531	2.15494	0.253653	1.33266	0.179792	0.889019	0
			11.9412	78.239	10355.7	306.882	17458.1	751.774	40.5109	962.985	16.2618	4.52845	0.721853	19.8158	13.7692	0.0647803	0.00311728	0.0244756	0.0267942	0.602831	1.35023	0.6907	3.11617	0.530075	4.2712	0.77665	1.97853	0.220229	1.27047	0.153462	0.897391	0
			6.6477	103.832	13039.1	389.176	16441	507.444	32.0242	786.202	12.6081	5.05987	1.02942	23.651	15.853	0.0720366	0	0.00495637	0.0248855	0.596888	1.28951	0.795063	3.30714	0.607812	4.53676	0.944604	2.28627	0.280635	1.59737	0.185909	0.869514	0
			14.5155	99.2076	14489.7	387.439	16616.2	538.299	34.1939	826.786	13.6179	4.83337	1.10428	20.5407	14.8976	0.0633626	0.0172351	0.0170576	0.0272208	0.528873	1.42893	0.775985	3.14523	0.590318	4.24449	0.767915	2.08341	0.223345	1.26386	0.148159	0.798737	0
		Average	12.0786	92.3675	12006.7	360.853	17146.4	618.01	35.8743	894.486	13.7671	5.24796	1.02836	21.5513	15.4504	0.0648946	0.00534912	0.0174026	0.0265375	0.590737	1.48417	0.758205	3.33024	0.611152	4.33518	0.833052	2.08742	0.238834	1.32976	0.162534	0.869939	0
		SD	4.02578	10.2437	1711.79	33.4585	636.039	98.5013	3.14906	88.5568	1.65458	0.647794	0.19425	1.72401	1.39032	0.00740927	0.0067891	0.0078892	0.00112016	0.0352399	0.183433	0.050766	0.225548	0.0743209	0.243755	0.0731513	0.140999	0.0276603	0.158592	0.0188974	0.0412834	0
1829a	Harzburgite	Metasomatic	66.4311	91.9384	7100.44	425.081	19509	671.733	70.8351	863.864	13.3516	5.46559	28.2374	15.7961	48.9386	3.26295	0.0408219	1.05168	0.51402	6.4084	4.05786	1.8006	4.76562	0.709218	3.71168	0.649223	1.19577	0.142161	0.682096	0.118161	1.44333	0.202582
			48.3798	89.4264	5811.46	381.865	17248.6	637.366	31.9944	704.541	11.4955	4.4066	19.671	13.4388	42.9197	2.81793	0.0496175	0.86821	0.456184	5.27982	3.87755	1.6322	4.14418	0.656392	3.41723	0.513618	1.07297	0.117736	0.557908	0.0980467	1.15204	0.173221
		Average	57.4055	90.6824	6455.95	403.473	18378.8	654.549	51.4148	784.202	12.4236	4.9361	23.9542	14.6175	45.9291	3.04044	0.0452197	0.959943	0.485102	5.84411	3.96771	1.7164	4.4549	0.682805	3.56445	0.581421	1.13437	0.129948	0.620002	0.108104	1.29769	0.187901
		SD	12.7641	1.77627	911.449	30.5587	1598.32	24.3009	27.4645	112.658	1.31244	0.74882	6.0574	1.66684	4.25597	0.314675	0.00621944	0.12973	0.0408963	0.79803	0.127502	0.119081	0.439424	0.0373536	0.208212	0.0958869	0.086836	0.0172711	0.0878144	0.0142233	0.205972	0.0207614
