# Supplementary material for: The formation of giant podiform chromitite by asthenospheric melts in supra-subduction zone environments
Source: Research Square preprint supplement (doi:10.21203/rs.3.rs-225374/v1), 2021-03-10
Supplement: Supplementary file 2 [file 3972db6d3288886b282e74ac.xlsx]

## Sheet: Clinopyroxene
Data 1-1 Major element composition (wt%) of clinopyroxene from the Luobusa peridotites
Sample	Lithology	Group	Analysis number	SiO2	TiO2	Al2O3	Cr2O3	FeO	MnO	MgO	CaO	Na2O	K2O	NiO	Total	Mg#	Cr#
1801	Harzburgite	Normala	1	52.266	0.173	3.34	0.552	2.37	0.089	17.545	23.651	0.141	0.002	0.05	100.179	93.0194	9.98326
			2	51.342	0.213	4.133	0.867	2.297	0.085	17.569	23.02	0.22	0	0.045	99.791	93.2284	12.3399
			3	52.812	0.158	2.081	0.431	3.156	0.112	17.012	24.24	0.15	0	0.047	100.199	90.6565	12.2024
			4	51.129	0.194	4.481	0.961	2.317	0.072	16.769	23.498	0.209	0	0.049	99.679	92.871	12.5809
			5	51.946	0.183	4.211	0.937	2.516	0.065	17.952	22.489	0.182	0	0.039	100.52	92.7763	12.9918
			6	51.632	0.177	4.182	0.93	2.556	0.087	17.405	22.958	0.173	0.003	0.046	100.149	92.4568	12.9852
			Average	51.8545	0.183	3.738	0.779667	2.53533	0.085	17.3753	23.3093	0.179167	0.000833333	0.046	100.086	92.5014	12.1806
			S. D.	0.621775	0.0188786	0.898108	0.228588	0.321818	0.0162358	0.424115	0.616209	0.0313395	0.00132916	0.00389872	0.305423	0.939632	1.12427
1829b	Harzburgite	Normal	1	52.029	0.094	3.078	0.86	2.204	0.079	17.102	23.529	0.137	0	0.042	99.154	93.3187	15.789
			2	51.483	0.12	3.287	1.105	2.962	0.127	16.611	23.594	0.079	0	0.03	99.398	90.9865	18.4066
			3	52.171	0.118	3.107	0.938	2.049	0.059	17.331	24.258	0.078	0	0.043	100.152	93.8366	16.8461
			4	51.836	0.113	3.78	1.133	2.211	0.082	16.811	23.877	0.112	0	0.045	100	93.1908	16.7456
			5	51.426	0.09	3.604	1.138	2.074	0.075	16.643	23.864	0.113	0.004	0.049	99.08	93.5251	17.4844
			6	52.211	0.112	3.149	0.999	2.174	0.073	17.057	23.76	0.047	0	0.051	99.633	93.3874	17.5521
			7	51.647	0.135	3.757	1.177	2.199	0.08	16.879	23.662	0.12	0.007	0.04	99.703	93.2507	17.371
			8	51.6644	0.109111	3.673	1.13533	2.50089	0.0834444	17.4512	22.833	0.0962222	0.00233333	0.0453333	99.5943	92.684	17.1653
			Average	51.8084	0.111389	3.42938	1.06067	2.29674	0.0823056	16.9857	23.6721	0.0977778	0.00166667	0.0431667	99.5893	93.0225	17.17
			S. D.	0.302815	0.0143595	0.303878	0.11427	0.301379	0.0196336	0.305731	0.407182	0.028762	0.00262467	0.00641674	0.37524	0.88452	0.756548
1830	Harzburgite	Normal	1	50.174	0.105	5.398	1.333	2.66	0.087	18.026	22.4	0.088	0.015	0.06	100.346	92.4231	14.2155
			2	51.618	0.105	3.845	1.152	2.416	0.079	16.822	23.69	0.133	0	0.06	99.92	92.6106	16.7398
			3	50.991	0.085	4.427	1.292	2.266	0.061	16.709	23.636	0.106	0.002	0.055	99.63	92.9937	16.377
			4	50.699	0.097	3.702	0.964	2.558	0.073	17.963	22.43	0.148	0.02	0.058	98.712	92.6687	14.8749
			5	52.226	0.093	3.312	1.02	2.107	0.09	17.245	23.907	0.091	0.009	0.045	100.145	93.6437	17.1269
			6	51.603	0.128	3.891	1.178	2.035	0.061	16.673	24.059	0.099	0	0.048	99.775	93.6498	16.8856
			7	51.658	0.124	3.555	1.027	2.157	0.069	17.089	23.748	0.164	0.002	0.052	99.645	93.4472	16.2381
			8	51.241	0.124	3.748	1.074	2.264	0.064	17.291	23.501	0.075	0.004	0.036	99.422	93.2191	16.1279
			Average	51.2763	0.107625	3.98475	1.13	2.30788	0.073	17.2273	23.4214	0.113	0.0065	0.05175	99.6994	93.082	16.0732
			S. D.	0.643883	0.0160529	0.654048	0.132903	0.220227	0.0113767	0.526827	0.643614	0.0316769	0.00748331	0.00839643	0.497237	0.481812	1.01588
1724	Harzburgite	Normal	1	51.117	0.081	3.581	1.177	2.112	0.068	18.567	21.272	0.119	0	0.046	98.14	94.0562	18.0705
			2	52.545	0.06	3.332	1.01	1.84	0.051	16.977	23.713	0.141	0	0.025	99.694	94.3207	16.9028
			3	51.041	0.073	3.667	1.154	2.056	0.079	18.541	21.526	0.138	0.007	0.051	98.333	94.197	17.4358
			4	52.634	0.124	2.461	0.739	1.776	0.055	17.539	23.604	0.11	0.003	0.044	99.089	94.6741	16.7712
			5	52.925	0.097	2.646	0.784	1.798	0.073	17.591	23.544	0.143	0	0.047	99.648	94.6267	16.5854
			6	53.003	0.07	3.194	0.897	2.18	0.051	19.106	20.754	0.135	0.002	0.047	99.439	94.039	15.8573
			7	52.636	0.07	2.901	0.834	1.758	0.042	17.426	23.363	0.11	0	0.033	99.173	94.6928	16.172
			8	52.228	0.095	3.222	0.929	1.855	0.064	16.852	23.624	0.172	0	0.052	99.093	94.2371	16.2117
			9	52.391	0.098	3.081	0.875	1.924	0.058	17.076	23.432	0.16	0	0.037	99.132	94.1091	16.0072
			10	52.554	0.085	3.077	0.902	1.739	0.048	16.847	23.853	0.113	0	0.007	99.225	94.5764	16.4379
			Average	52.3074	0.0853	3.1162	0.9301	1.9038	0.0589	17.6522	22.8685	0.1341	0.0012	0.0389	99.0966	94.3529	16.6452
			S. D.	0.685672	0.018762	0.377521	0.145104	0.158325	0.0118176	0.80861	1.18485	0.0213044	0.00229976	0.0140432	0.505523	0.264235	0.68515
1825	Harzburgite	Metasomaticb	1	52.991	0.342	3.287	1.521	1.793	0.057	17.158	22.69	0.775	0.007	0.057	100.678	94.513	23.6943
			2	52.382	0.384	3.504	1.506	2.131	0.075	17.441	21.662	0.761	0	0.045	99.891	93.6435	22.3852
			3	51.815	0.379	3.437	1.505	2.081	0.074	17.177	21.779	0.662	0.007	0.055	98.971	93.6939	22.7108
			4	53.111	0.292	3.035	1.526	1.751	0.066	17.199	22.964	0.617	0.003	0.053	100.617	94.6468	25.2284
			5	52.324	0.37	3.455	1.145	1.662	0.048	16.258	22.763	0.694	0	0.035	98.754	94.626	18.193
			6	52.654	0.358	3.29	1.09	1.932	0.056	17.396	21.877	0.645	0	0.013	99.311	94.1886	18.1887
			7	52.465	0.361	3.301	1.135	1.788	0.061	16.45	22.616	0.716	0.005	0.047	98.945	94.3054	18.7475
			8	52.112	0.368	3.31	1.15	1.874	0.045	17.379	21.725	0.715	0	0.036	98.714	94.348	18.9065
			9	52.438	0.231	2.09	0.882	2.131	0.041	18.438	21.41	0.677	0.003	0.032	98.373	93.9665	22.0693
			Average	52.4769	0.342778	3.18989	1.27333	1.90478	0.0581111	17.2107	22.1651	0.695778	0.00277778	0.0414444	99.3616	94.2146	21.1249
			S. D.	0.403585	0.0500319	0.434452	0.242526	0.174576	0.0121495	0.62373	0.583481	0.051949	0.00299073	0.0140188	0.842895	0.375933	2.65109
1826	Harzburgite	Metasomatic	1	52.657	0.373	3.928	1.449	1.584	0.048	16.263	22.12	0.99	0.004	0.04	99.456	94.8667	19.8425
			2	53.199	0.27	3.085	1.228	1.579	0.046	16.941	22.484	0.916	0	0.031	99.779	95.0768	21.0806
			3	52.671	0.345	3.461	1.385	1.561	0.043	16.425	22.286	0.866	0	0.033	99.076	94.9849	21.1691
			4	52.935	0.363	3.466	1.616	1.617	0.042	16.897	21.978	0.979	0	0.029	99.922	94.9519	23.8312
			5	52.893	0.302	2.923	1.248	1.501	0.056	16.695	22.765	0.75	0.005	0.038	99.176	95.2428	22.2704
			6	52.907	0.3	3.131	1.579	1.514	0.055	16.762	22.596	0.856	0.005	0.034	99.739	95.2218	25.285
			7	52.865	0.379	3.808	1.406	1.586	0.052	16.567	21.71	1.078	0.004	0.063	99.518	94.9501	19.8569
			8	53.181	0.274	2.475	1.06	1.488	0.05	16.903	23.05	0.734	0	0.018	99.233	95.3374	22.3241
			9	53.451	0.268	2.703	0.975	1.672	0.062	17.13	22.303	0.87	0	0.04	99.474	94.8563	19.4883
			10	53.483	0.258	2.719	1.285	1.499	0.034	16.822	22.238	0.887	0	0.045	99.27	95.283	24.0779
			Average	53.0242	0.3132	3.1699	1.3231	1.5601	0.0488	16.7405	22.353	0.8926	0.0018	0.0371	99.4643	95.0772	21.9226
			S. D.	0.292809	0.0473634	0.486276	0.206656	0.0595435	0.0080526	0.260263	0.388779	0.105383	0.00234758	0.011761	0.281302	0.180074	1.99088
1827	Harzburgite	Metasomatic	1	52.681	0.191	2.712	1.702	1.569	0.069	16.7	22.611	0.851	0	0.029	99.115	95.0394	29.634
			2	52.711	0.241	2.805	1.759	1.59	0.058	16.768	22.637	1.038	0.005	0.027	99.639	94.9957	29.6178
			3	52.742	0.294	3.331	1.777	1.816	0.075	17.126	21.019	1.034	0	0.048	99.262	94.4368	26.3617
			4	52.602	0.194	2.819	1.858	1.77	0.082	16.387	22.128	0.852	0	0.036	98.728	94.339	30.6658
			5	53.216	0.115	2.228	1.682	1.555	0.051	17.143	22.486	1.011	0	0.027	99.514	95.2025	33.6255
			6	52.73	0.24	3.263	1.879	1.731	0.076	16.647	22.301	1.167	0	0.055	100.089	94.5387	27.8721
			7	52.434	0.262	3.334	1.8	1.653	0.067	16.364	22.051	1.016	0	0.042	99.023	94.6863	26.5945
			8	53.127	0.201	3.137	1.862	1.757	0.068	16.356	21.894	1.156	0	0.045	99.603	94.3682	28.4851
			9	53.03	0.186	2.973	1.892	1.672	0.057	16.645	22.091	0.936	0	0.031	99.513	94.7144	29.9256
			10	52.862	0.241	3.277	1.855	1.847	0.063	16.988	21.462	0.909	0	0.05	99.554	94.3038	27.5289
			11	53.407	0.158	2.552	1.68	1.681	0.061	16.967	22.578	0.922	0	0.051	100.057	94.783	30.6403
			12	53.115	0.166	2.964	1.731	1.599	0.067	16.999	22.435	0.959	0	0.037	100.072	95.0337	28.1558
			Average	52.8881	0.207417	2.94958	1.78975	1.68667	0.0661667	16.7575	22.1411	0.987583	0.000416667	0.0398333	99.5141	94.7034	29.0922
			S. D.	0.288382	0.0499463	0.344796	0.078957	0.0981106	0.00881974	0.289411	0.493655	0.103396	0.00144338	0.0100167	0.431021	0.311336	2.03514
1829a	Harzburgite	Metasomatic	1	53.396	0.143	2.961	1.841	1.772	0.068	16.344	21.457	1.123	0	0.053	99.158	94.3189	29.4397
			2	53.115	0.177	3.354	2.293	1.529	0.051	16.282	21.517	1.43	0.002	0.058	99.808	95.0416	31.4492
			3	53.37	0.17	3.186	1.859	1.585	0.056	16.57	21.726	1.264	0	0.024	99.81	94.954	28.1378
			4	52.914	0.189	3.15	1.87	1.823	0.086	16.743	21.137	1.13	0.003	0.038	99.083	94.2961	28.4882
			5	53.229	0.19	3.369	1.861	1.789	0.06	16.509	21.613	1.275	0.003	0.04	99.935	94.3216	27.0436
			6	53.431	0.15	3	1.664	1.476	0.051	16.776	21.521	1.104	0	0.017	99.19	95.3398	27.1249
			7	53.663	0.233	3.089	1.676	1.616	0.059	16.931	21.506	1.301	0.002	0.034	100.11	94.9644	26.6912
			8	54.101	0.174	2.981	1.414	1.599	0.051	16.558	21.394	1.251	0	0.042	99.565	94.9082	24.145
			9	54.025	0.152	2.698	1.458	1.509	0.05	16.455	21.759	1.235	0.004	0.021	99.366	95.1523	26.6129
			10	54.077	0.123	2.341	1.324	1.432	0.05	16.693	21.577	1.455	0.004	0.035	99.111	95.451	27.5114
			Average	53.5321	0.1701	3.0129	1.726	1.613	0.0582	16.5861	21.5207	1.2568	0.0018	0.0362	99.5136	94.8748	27.6644
			S. D.	0.419465	0.0306538	0.307715	0.284503	0.137739	0.0113901	0.201751	0.175812	0.119933	0.00168655	0.0131808	0.381648	0.42407	1.92981
1813b	Harzburgite	Hydrousc	1	53.563	0.005	1.328	0.804	1.469	0.072	18.392	24.177	0.075	0.003	0.035	99.923	95.7512	28.8899
			2	53.339	0.027	1.882	0.937	1.526	0.072	17.891	24.268	0.089	0.005	0.055	100.091	95.4758	25.0431
			3	53.61	0.039	1.634	0.879	1.735	0.06	18.475	23.51	0.048	0.004	0.058	100.052	95.0414	26.524
			4	53.316	0	1.209	0.713	1.554	0.059	18.318	24.143	0.068	0.002	0.058	99.44	95.4991	28.3539
			5	54.075	0.026	1.301	0.973	1.72	0.08	18.364	23.915	0.072	0.002	0.051	100.579	95.0539	33.4164
			6	53.388	0.01	1.539	1.142	1.679	0.072	18.066	23.786	0.05	0.006	0.033	99.771	95.0903	33.242
			Average	53.5485	0.0178333	1.48217	0.908	1.61383	0.0691667	18.251	23.9665	0.067	0.00366667	0.0483333	99.976	95.3186	29.2449
			S. D.	0.28457	0.0151184	0.251936	0.147989	0.111777	0.00810967	0.224116	0.286353	0.0156461	0.00163299	0.0114134	0.378085	0.297798	3.44548
1810	Harzburgite	Hydrous	1	53.676	0.043	1.646	0.857	1.58	0.073	18.12	24.071	0.056	0	0.047	100.169	95.3796	25.8923
			2	53.764	0.034	1.359	0.676	1.517	0.072	18.41	24.333	0.076	0	0.051	100.292	95.6226	25.0261
			3	53.879	0.033	1.413	0.767	1.613	0.077	18.442	24.138	0.107	0	0.049	100.518	95.3661	26.7001
			4	53.778	0.035	1.349	0.82	1.753	0.067	18.607	23.796	0.028	0	0.049	100.282	95.0263	28.9725
			5	53.114	0.025	1.583	0.832	1.676	0.063	18.661	23.74	0.091	0	0.038	99.823	95.2475	26.0735
			6	54.129	0.04	1.268	0.519	1.342	0.046	17.838	24.39	0.063	0	0.019	99.654	95.9881	21.5481
			7	53.825	0.027	1.508	0.615	1.675	0.054	18.391	23.438	0.072	0	0.041	99.646	95.1838	21.4869
			8	53.856	0.053	1.432	0.62	1.544	0.056	18.209	24.031	0.091	0	0.024	99.916	95.5012	22.513
			9	53.726	0.047	1.164	0.468	1.465	0.049	18.434	24.106	0.049	0	0.048	99.556	95.7715	21.2477
			Average	53.7497	0.0374444	1.41356	0.686	1.57389	0.0618889	18.3458	24.0048	0.0703333	0	0.0406667	99.984	95.4541	24.3845
			S. D.	0.271263	0.00916667	0.151084	0.141414	0.124528	0.0111629	0.254543	0.300858	0.0243413	0	0.011694	0.342769	0.301768	2.77788
1813c	Harzburgite	Hydrous	1	53.892	0.033	1.044	0.544	1.562	0.069	18.251	23.984	0.126	0	0.042	99.547	95.4611	25.9077
			2	53.993	0.008	1.434	0.801	2.171	0.089	19.317	20.865	0.12	0.002	0.042	98.842	94.1232	27.264
			3	53.863	0.012	0.969	0.565	1.665	0.07	18.147	24.053	0.135	0	0.052	99.531	95.15	28.1234
			4	54.306	0.005	0.873	0.587	1.344	0.03	18.245	24.492	0.098	0	0.041	100.021	96.0685	31.0921
			5	53.975	0.029	1.276	0.833	1.698	0.069	18.267	23.556	0.139	0	0.044	99.886	95.0894	30.4627
			6	54.65	0.053	1.092	0.451	1.488	0.043	18.249	23.629	0.117	0.006	0.049	99.827	95.6664	21.7005
			7	54.198	0.057	1.26	0.567	1.302	0.038	17.801	24.255	0.093	0	0.026	99.597	96.0952	23.1935
			8	54.155	0.043	1.117	0.535	1.395	0.049	18.152	23.909	0.114	0	0.031	99.5	95.9053	24.3232
			9	54.351	0.032	1.091	0.556	1.322	0.045	18.278	24.041	0.126	0.002	0.043	99.887	96.137	25.4835
			10	53.917	0.019	0.958	0.415	1.554	0.038	18.7	23.367	0.1	0	0.044	99.112	95.587	22.5224
			Average	54.13	0.0291	1.1114	0.5854	1.5501	0.054	18.3407	23.6151	0.1168	0.001	0.0414	99.575	95.5283	26.0073
			S. D.	0.252006	0.0182175	0.169724	0.133651	0.259213	0.0189912	0.405742	1.02211	0.015683	0.00194365	0.00769126	0.367722	0.620309	3.22307
a Normal (Abyssal) peridotites after dry melting
b SSZ peridotites after hydrous melting
c Metasomatized peridotites by asthenospheric Cr-rich melt

## Sheet: Chromite
Data 1-2 Major element compositions (wt%) of chromite from the Luobusa peridotites and chromtites
Sample	Lithology	Type	Analysis number	TiO2	Al2O3	Cr2O3	FeO	MnO	MgO	NiO	Total	Cr#
1801	Harzburgite	Normal	1	0.035	49.798	18.001	13.429	0.158	18.985	0.271	100.677	19.5218
			2	0.073	49.531	18.413	13.525	0.137	18.713	0.288	100.68	19.9655
			3	0.002	49.905	18.636	13.125	0.133	18.947	0.266	101.014	20.0378
			4	0.062	49.997	17.82	12.94	0.153	19.305	0.282	100.559	19.3013
			5	0.035	48.932	18.835	13.162	0.161	19.015	0.277	100.417	20.5279
			6	0.061	50.519	17.806	12.888	0.156	19.151	0.292	100.873	19.1279
			7	0	49.955	17.804	13.991	0.15	18.139	0.238	100.277	19.3004
			Average	0.0382857	49.8053	18.1879	13.2943	0.149714	18.8936	0.273429	100.642	19.6832
			S.D.	0.0291188	0.485869	0.434686	0.385904	0.0107038	0.37936	0.0180726	0.253361	0.507564
1830	Harzburgite	Normal	1	0.026	43.913	23.461	15.187	0.177	16.98	0.203	99.947	26.3903
			2	0.043	42.72	24.495	15.576	0.196	16.038	0.191	99.259	27.7859
			3	0.045	42.341	24.894	15.697	0.187	16.68	0.189	100.033	28.2917
			4	0.061	40.746	24.31	16.363	0.207	16.502	0.192	98.381	28.5901
			5	0.034	42.951	24.06	16.395	0.174	16.388	0.189	100.191	27.3206
			Average	0.0418	42.5342	24.244	15.8436	0.1882	16.5176	0.1928	99.5622	27.6757
			S.D.	0.0131415	1.15589	0.533105	0.523938	0.0136272	0.349014	0.00584808	0.750379	0.866886
1829b	Harzburgite	Normal	1	0.021	40.052	26.63	16.491	0.199	16.112	0.196	99.701	30.852
			2	0.053	37.82	28.99	15.78	0.211	16.156	0.197	99.207	33.9663
			3	0.085	38.439	28.771	15.831	0.203	16.35	0.185	99.864	33.4342
			4	0.037	39.566	27.805	15.261	0.184	16.975	0.193	100.021	32.0459
			5	0.009	40.768	27.223	14.583	0.185	17.358	0.212	100.338	30.9439
			Average	0.041	39.329	27.8838	15.5892	0.1964	16.5902	0.1966	99.8262	32.2485
			S.D.	0.0296648	1.1957	1.00321	0.712087	0.0116962	0.550565	0.00981326	0.418449	1.41863
1724	Harzburgite	Normal	1	0.047	34.634	31.314	16.674	0.207	15.012	0.099	97.987	37.7616
			2	0.051	34.736	33.016	16.904	0.182	14.793	0.137	99.819	38.9434
			3	0.055	33.873	33.811	16.273	0.205	14.807	0.122	99.146	40.1135
			4	0.056	34.051	33.776	16.144	0.192	15.207	0.118	99.544	39.9628
			5	0.063	33.189	34.679	15.783	0.192	15.081	0.112	99.099	41.2172
			6	0.062	35.932	31.21	16.927	0.201	15.092	0.114	99.538	36.8235
			7	0.044	33.737	33.715	16.067	0.197	14.756	0.096	98.612	40.1418
			Average	0.054	34.3074	33.0744	16.396	0.196571	14.964	0.114	99.1064	39.2805
			S.D.	0.00716473	0.890722	1.32906	0.443462	0.00869592	0.177285	0.0139164	0.630434	1.5335
1825	Harzburgite	Metasomatic	1	0.32	29.595	37.553	17.051	0.244	14.416	0.099	99.278	45.9896
			2	0.316	29.485	38.564	16.002	0.255	14.779	0.092	99.493	46.7429
			4	0.345	29.676	37.804	16.546	0.257	14.612	0.112	99.352	46.0872
			5	0.31	28.911	38.859	16.47	0.242	14.722	0.096	99.61	47.4225
			6	0.326	31.424	36.824	15.065	0.207	15.3	0.124	99.27	44.0205
			7	0.356	29.645	37.619	16.745	0.249	14.522	0.124	99.26	45.9913
			8	0.335	29.461	38.209	16.31	0.223	14.329	0.112	98.979	46.533
			9	0.369	30.205	37.863	15.745	0.214	14.474	0.08	98.95	45.6872
			10	0.335	29.591	37.769	16.624	0.215	14.312	0.093	98.939	46.1355
			11	0.316	30.383	37.521	17.049	0.224	13.979	0.084	99.556	45.3165
			12	0.34	30.604	37.332	16.295	0.227	14.569	0.096	99.463	45.012
			Average	0.333455	29.9073	37.8106	16.3547	0.232455	14.5467	0.101091	99.2864	45.9035
			S.D.	0.0182995	0.692149	0.567395	0.583665	0.0175862	0.332363	0.0149295	0.241859	0.907897
1826	Harzburgite	Metasomatic	1	0.245	29.254	39.297	15.862	0.224	14.729	0.078	99.689	47.4079
			2	0.373	28.023	41.255	13.914	0.216	15.493	0.097	99.371	49.696
			3	0.274	28.566	39.825	15.552	0.23	14.559	0.075	99.081	48.3349
			4	0.291	28.6	39.81	16.182	0.253	14.277	0.077	99.49	48.2958
			5	0.249	27.613	40.299	16.779	0.241	14.027	0.102	99.31	49.4783
			6	0.26	27.733	40.087	17.009	0.228	13.775	0.068	99.16	49.2381
			7	0.218	29.073	39.289	16.061	0.217	14.353	0.066	99.277	47.5576
			8	0.308	28.698	39.537	15.498	0.22	14.395	0.087	98.743	48.0386
			9	0.248	28.518	39.697	16.371	0.254	14.145	0.091	99.324	48.2965
			10	0.31	27.912	40.184	17.011	0.232	14.161	0.072	99.882	49.1377
			11	0.274	27.395	39.772	17.302	0.226	13.646	0.073	98.688	49.3474
			Average	0.277273	28.3077	39.9138	16.1401	0.231	14.3236	0.0805455	99.2741	48.6208
			S.D.	0.0423062	0.609379	0.552156	0.955196	0.0131909	0.50018	0.0119613	0.357402	0.793762
1827	Harzburgite	Metasomatic	1	0.25	24.553	43.448	15.328	0.265	14.502	0.083	98.429	54.285
			2	0.302	25.312	42.896	15.461	0.261	14.49	0.09	98.812	53.2104
			3	0.298	25.347	43.452	15.431	0.242	14.439	0.076	99.285	53.4965
			4	0.295	26.583	42.718	14.853	0.232	14.623	0.086	99.39	51.8851
			5	0.225	27.131	41.576	15.411	0.24	14.694	0.056	99.333	50.6984
			6	0.261	25.458	43.015	16.161	0.258	14.018	0.07	99.241	53.1362
			7	0.249	23.427	44.371	18.506	0.288	12.459	0.066	99.366	55.9662
			8	0.264	24.353	43.427	17.072	0.253	13.507	0.079	98.955	54.476
			9	0.237	26.216	42.229	16.669	0.245	13.939	0.064	99.599	51.9448
			10	0.245	25.908	42.744	15.87	0.255	14.39	0.08	99.492	52.542
			11	0.244	25.045	43.253	16.463	0.262	13.564	0.064	98.895	53.6804
			Average	0.260909	25.3939	43.0117	16.1114	0.254636	14.0568	0.074	99.1634	53.211
			SD	0.026262	1.05668	0.728546	1.03566	0.0151939	0.669556	0.0107238	0.348997	1.44132
1829a	Harzburgite	Metasomatic	1	0.189	22.244	45.66	16.559	0.286	13.351	0.073	98.362	57.9383
			2	0.189	23.899	44.227	16.495	0.276	13.283	0.068	98.437	55.3937
			3	0.24	23.979	44.834	15.274	0.272	14.294	0.082	98.975	55.6478
			4	0.21	23.651	44.629	16.044	0.268	14.114	0.069	98.985	55.8745
			5	0.245	23.48	45.638	15.35	0.237	14.217	0.07	99.237	56.6033
			6	0.218	23.225	45.214	15.385	0.264	14.038	0.061	98.405	56.6423
			7	0.228	24.187	44.18	16.208	0.253	13.62	0.061	98.737	55.0712
			8	0.245	23.347	45.543	16.154	0.254	13.477	0.055	99.075	56.6916
			9	0.207	24.016	45.57	15.193	0.237	14.253	0.061	99.537	56.0113
			10	0.198	23.958	44.754	16.623	0.254	13.341	0.041	99.169	55.6254
			11	0.211	24.159	44.623	16.772	0.257	13.12	0.051	99.193	55.3466
			Average	0.216364	23.6495	44.9884	16.0052	0.259818	13.7371	0.0629091	98.9193	56.0769
			S.D.	0.0208052	0.567863	0.560756	0.599107	0.0153089	0.448725	0.0112912	0.386309	0.829717
1813b	Harzburgite	Hydrous	1	0.078	21.466	46.741	17.066	0.28	12.832	0.044	98.507	59.3691
			2	0.052	21.077	47.4	16.537	0.29	13.37	0.052	98.778	60.1455
			3	0.059	21.949	46.521	16.021	0.256	13.638	0.06	98.504	58.7169
			4	0.046	22.206	45.148	17.362	0.305	13.244	0.047	98.358	57.705
			5	0.042	22.162	45.731	17.026	0.304	13.059	0.057	98.381	58.0662
			6	0.057	22.669	45.689	16.431	0.269	13.649	0.074	98.838	57.492
			Average	0.0556667	21.9215	46.205	16.7405	0.284	13.2987	0.0556667	98.561	58.5824
			S.D.	0.0126912	0.569026	0.827449	0.495703	0.0195038	0.322855	0.0107827	0.201788	1.03011
1810	Harzburgite	Hydrous	1	0.067	19.381	49.333	16.411	0.303	13.376	0.095	98.966	63.074
			2	0.073	19.541	48.745	16.209	0.279	13.606	0.085	98.538	62.602
			3	0.051	21.261	46.681	17.244	0.292	13.003	0.064	98.596	59.5694
			4	0.069	20.179	49.124	16.202	0.279	13.81	0.078	99.741	62.0294
			5	0.037	20.461	47.082	19.365	0.308	11.369	0.042	98.664	60.6939
			6	0.053	20.064	47.914	18.897	0.326	12.015	0.054	99.323	61.5756
			7	0.062	21.294	46.841	18.137	0.298	12.506	0.063	99.201	59.6144
			8	0.074	19.752	48.512	16.343	0.272	13.833	0.08	98.866	62.2377
			9	0.072	21.706	46.618	17.544	0.291	12.673	0.049	98.953	59.0369
			10	0.086	22.03	46.393	16.735	0.248	12.981	0.053	98.526	58.5607
			11	0.065	20.711	47.769	17.759	0.296	12.222	0.022	98.844	60.7497
			Average	0.0644545	20.58	47.7284	17.3496	0.290182	12.854	0.0622727	98.9289	60.8858
			S.D.	0.0133594	0.894708	1.07353	1.10375	0.0205515	0.788107	0.0212513	0.373913	1.53538
1813c	Harzburgite	Hydrous	1	0.091	17.581	50.897	17.123	0.301	12.336	0.066	98.395	66.0176
			2	0.076	17.858	50.841	17.073	0.306	12.711	0.051	98.916	65.6412
			3	0.069	18.703	49.291	17.772	0.327	12.146	0.061	98.369	63.8798
			4	0.07	16.616	52.622	15.673	0.278	13.348	0.068	98.675	68.0019
			5	0.079	18.285	50.037	17.646	0.311	12.11	0.044	98.512	64.7433
			6	0.066	17.979	50.129	18.356	0.342	11.388	0.059	98.319	65.1693
			7	0.053	19.553	48.618	18.962	0.309	11.3	0.025	98.82	62.5265
			8	0.065	18.553	49.89	18.101	0.287	11.712	0.028	98.636	64.343
			9	0.067	18.71	50.328	17.115	0.283	12.331	0.045	98.879	64.3502
			Average	0.0706667	18.2042	50.2948	17.5357	0.304889	12.1536	0.0496667	98.6134	64.9636
			S.D.	0.0105712	0.831671	1.12667	0.943785	0.0207933	0.6436	0.0156205	0.227344	1.53165
1814b	Harzburgite	Hydrous	1	0.085	22.563	45.697	17.649	0.308	12.724	0.064	99.09	57.6107
			2	0.059	21.29	47.267	17.408	0.308	13.012	0.055	99.399	59.8367
			3	0.065	21.956	46.179	17.163	0.292	13.082	0.046	98.783	58.5302
			4	0.066	22.217	46.753	15.21	0.255	14.268	0.081	98.85	58.5432
			5	0.074	22.791	45.766	17.11	0.275	13.26	0.055	99.331	57.4019
			Average	0.0698	22.1634	46.3324	16.908	0.2876	13.2692	0.0602	99.0906	58.3846
			S.D.	0.0100349	0.583583	0.670532	0.973154	0.0227662	0.590789	0.0132552	0.276319	0.964316
1707a	Chromitite	Disseminated	1	0.148	9.599	59.918	15.661	0.279	13.684	0.073	99.362	80.7277
			2	0.167	9.918	59.572	14.917	0.266	13.77	0.086	98.696	80.1218
			3	0.156	9.612	60.009	14.723	0.263	13.937	0.06	98.76	80.7302
			4	0.189	9.788	59.801	14.936	0.249	13.891	0.064	98.918	80.3917
			5	0.174	9.67	59.974	14.588	0.26	14.155	0.057	98.878	80.6273
			6	0.174	9.782	59.535	14.735	0.233	13.495	0.077	98.031	80.331
			Average	0.168	9.72817	59.8015	14.9267	0.258333	13.822	0.0695	98.7742	80.4883
			S.D.	0.0145465	0.123351	0.204977	0.382711	0.0157438	0.226959	0.0111131	0.432579	0.24638
1719b	Chromitite	Disseminated	1	0.155	9.162	57.656	19.617	0.311	11.572	0.084	98.557	80.8535
			2	0.178	9.575	56.126	21.651	0.338	10.908	0.067	98.843	79.7305
			3	0.159	9.367	57.033	20.7	0.345	11.384	0.065	99.053	80.3376
			4	0.145	9.173	56.533	22.513	0.353	10.408	0.077	99.202	80.5284
			5	0.165	9.366	56.336	22.172	0.347	10.463	0.056	98.905	80.1443
			6	0.162	8.591	57.346	21.158	0.333	10.813	0.052	98.455	81.7497
			7	0.159	8.911	57.803	20.21	0.318	10.987	0.069	98.457	81.3186
			Average	0.160429	9.16357	56.9761	21.1459	0.335	10.9336	0.0671429	98.7817	80.6661
			S.D.	0.0100309	0.327454	0.660155	1.04797	0.0155242	0.433241	0.011127	0.297733	0.69636
1815	Chromitite	Disseminated	1	0.249	10.48	57.537	15.497	0.296	14.193	0.108	98.36	78.6516
			2	0.259	10.59	57.281	15.872	0.298	14.109	0.068	98.477	78.4003
			3	0.229	10.714	57.696	15.197	0.271	14.326	0.097	98.53	78.3254
			4	0.215	10.732	57.229	16.308	0.333	13.533	0.077	98.427	78.1584
			5	0.237	10.503	57.493	15.64	0.245	13.854	0.079	98.051	78.6019
			6	0.233	10.89	56.92	15.497	0.257	13.431	0.088	97.316	77.8146
			7	0.238	10.879	57.31	15.614	0.264	13.459	0.083	97.847	77.9496
			Average	0.237143	10.684	57.3523	15.6607	0.280571	13.8436	0.0857143	98.144	78.2717
			S.D.	0.0141	0.166772	0.251992	0.349968	0.0302151	0.374158	0.0133631	0.441413	0.315783
1707c	Chromitite	Massive	1	0.144	9.167	59.073	18.083	0.312	11.592	0.07	98.441	81.2183
			2	0.172	9.466	58.752	17.499	0.299	12.2	0.037	98.425	80.6388
			3	0.157	9.456	59.312	17.188	0.299	12.735	0.065	99.212	80.8029
			4	0.172	9.3	59.046	17.929	0.341	11.994	0.062	98.844	80.9905
			5	0.169	9.437	58.916	17.945	0.32	11.822	0.062	98.671	80.7301
			6	0.174	9.782	59.535	14.735	0.233	13.495	0.077	98.031	80.331
			Average	0.164667	9.43467	59.1057	17.2298	0.300667	12.3063	0.0621667	98.604	80.7853
			S.D.	0.0118265	0.205846	0.280208	1.26701	0.0366424	0.700056	0.0135855	0.404646	0.30357
1718	Chromitite	Massive	1	0.118	9.054	60.669	14.049	0.258	14.31	0.086	98.544	81.8069
			2	0.126	8.995	60.732	13.721	0.25	14.568	0.094	98.486	81.9194
			3	0.132	9.154	60.731	13.839	0.245	14.462	0.093	98.656	81.6581
			4	0.141	9.218	59.947	13.763	0.256	14.622	0.097	98.044	81.3573
			5	0.113	8.887	60.844	15.089	0.272	13.502	0.059	98.766	82.1247
			6	0.101	9.02	60.555	14.331	0.237	14.193	0.055	98.492	81.8349
			7	0.1	8.896	60.812	14.652	0.254	13.582	0.066	98.362	82.1021
			Average	0.118714	9.032	60.6129	14.2063	0.253143	14.177	0.0785714	98.4786	81.829
			S.D.	0.0154025	0.123152	0.308519	0.513978	0.0109913	0.458208	0.0179709	0.23132	0.265321
1719c	Chromitite	Massive	1	0.188	9.396	59.576	15.83	0.257	13.668	0.116	99.031	80.97
			2	0.155	9.513	59.417	15.649	0.273	13.47	0.097	98.574	80.737
			3	0.166	9.192	58.984	15.941	0.263	13.752	0.078	98.376	81.1536
			4	0.174	9.405	58.907	15.672	0.275	13.934	0.123	98.49	80.7805
			5	0.154	9.091	59.188	16.184	0.257	13.45	0.105	98.429	81.3744
			6	0.178	9.164	58.234	18.052	0.314	12.379	0.062	98.383	81.0041
			7	0.152	9.356	58.305	17.465	0.322	12.617	0.08	98.297	80.702
			Average	0.166714	9.30243	58.9444	16.399	0.280143	13.3243	0.0944286	98.5114	80.9603
			S.D.	0.0138409	0.154135	0.516087	0.960863	0.0268975	0.592127	0.0220972	0.245607	0.244879
1808a	Chromitite	Nodular	1	0.216	10.143	58.34	15.973	0.288	13.852	0.097	98.936	80.3402
			2	0.176	10.046	58.236	15.367	0.315	13.356	0.086	97.685	80.8425
			3	0.163	10.454	58.549	15.829	0.283	13.372	0.093	98.83	80.6594
			4	0.229	10.353	58.635	15.538	0.268	13.565	0.056	98.701	80.3342
			5	0.203	10.495	57.179	15.76	0.262	13.702	0.11	98.265	79.6215
			6	0.21	10.385	58.394	15.294	0.241	13.792	0.099	98.437	80.0485
			7	0.222	10.315	58.768	15.362	0.249	13.578	0.079	98.562	80.2554
			8	0.186	10.685	58.667	15.28	0.27	13.866	0.089	99.094	79.8327
			9	0.204	10.486	58.58	15.108	0.257	13.957	0.073	98.719	79.8596
			Average	0.201	10.3736	58.372	15.5012	0.270333	13.6711	0.0868889	98.581	80.1994
			S.D.	0.0219032	0.192124	0.47839	0.292026	0.0224611	0.216995	0.0159487	0.419584	0.398906
2023	Chromitite	Nodular	1	0.193	9.484	59.31	15.218	0.254	13.838	0.072	98.369	80.7565
			2	0.244	10.051	59.111	14.645	0.235	14.634	0.106	99.026	79.7838
			3	0.248	9.909	59.316	14.465	0.241	14.708	0.089	98.976	80.0677
			4	0.22	9.86	59.513	14.555	0.256	14.627	0.118	99.149	80.1994
			5	0.232	9.465	57.836	17.813	0.299	12.556	0.065	98.266	80.394
			6	0.232	9.465	57.836	17.813	0.299	12.556	0.065	98.266	80.394
			7	0.209	9.093	58.68	18.582	0.319	12.071	0.07	99.024	81.2401
			8	0.237	9.154	58.144	19.408	0.331	11.788	0.078	99.14	80.9971
			9	0.189	8.431	55.443	20.119	0.338	12.291	0.061	96.872	81.5256
			10	0.206	9.005	58.077	20.311	0.338	11.046	0.075	99.058	81.2309
			Average	0.221	9.3917	58.3266	17.2929	0.291	13.0115	0.0799	98.6146	80.6589
			S.D.	0.0209072	0.48979	1.2012	2.3707	0.041042	1.3326	0.0188706	0.712251	0.578018
2027	Chromitite	Anti-nodular	1	0.225	10.536	58.983	14.723	0.246	14.319	0.082	99.114	78.9771
			2	0.202	9.955	59.374	14.96	0.25	14.703	0.064	99.508	80.0093
			3	0.231	10.577	58.646	14.77	0.249	14.457	0.117	99.047	78.817
			4	0.235	10.801	58.353	14.514	0.258	14.804	0.083	99.048	78.3802
			5	0.232	10.523	59.064	14.47	0.227	15.01	0.092	99.618	79.0203
			6	0.196	10.211	59.146	14.43	0.26	14.804	0.118	99.165	79.5375
			7	0.233	10.298	59.345	14.042	0.256	14.788	0.096	99.058	79.454
			8	0.217	10.39	58.428	14.246	0.26	14.593	0.091	98.225	79.0517
			Average	0.221375	10.4114	58.9174	14.5194	0.25075	14.6848	0.092875	99.0979	79.1559
			S.D.	0.0150137	0.258835	0.39661	0.295563	0.0109642	0.220157	0.0180352	0.416117	0.498632
1811a	Dunite	Envelope

## Sheet: Amphibole
Data 1-3 Major element compositions (wt%) of amphibole from the Luobusa peridotites and chromitites
Sample	Lithology	Group	No.	SiO2	TiO2	Al2O3	Cr2O3	FeO	MnO	MgO	CaO	Na2O	K2O	NiO	Total	Mg#	Cr#
1825	Harzburgite	Metasomatic	1	45.415	1.248	11.608	2.22	2.651	0.047	18.414	12.301	3.112	0	0.084	97.1	92.5942	11.374
			3	43.477	1.943	12.679	2.171	2.511	0.037	18.213	12.05	2.977	0	0.055	96.113	92.8856	10.3061
			4	45.708	1.638	11.677	2.095	2.585	0.036	18.296	12.161	3.26	0.003	0.09	97.549	92.722	10.7458
			5	43.071	2.295	12.889	2.012	2.601	0.048	17.965	11.959	3.181	0	0.097	96.118	92.5554	9.48201
			6	44.947	1.775	12.047	1.983	3.502	0.06	17.939	11.816	3.156	0	0.07	97.295	90.2157	9.94713
			7	45.366	1.668	11.921	2.149	2.652	0.033	17.968	12.028	3.147	0.001	0.084	97.017	92.4216	10.7916
			8	43.023	3.218	13.877	1.712	2.341	0.036	17.51	11.898	2.998	0.002	0.094	96.709	93.086	7.64578
			9	44.68	2.576	12.277	1.724	2.46	0.034	17.723	11.929	3.025	0.01	0.094	96.532	92.8408	8.61176
			10	43.071	2.295	12.889	2.012	2.601	0.048	17.965	11.959	3.181	0	0.097	96.118	92.5554	9.48201
			Average	44.3064	2.07289	12.4293	2.00867	2.656	0.0421111	17.9992	12.0112	3.11522	0.00177778	0.085	96.7279	92.4307	9.82069
			S.D.	1.13212	0.591838	0.728787	0.182992	0.3327	0.00910281	0.280268	0.146345	0.0957102	0.00327024	0.014151	0.545279	0.855373	1.16641
1826	Harzburgite	Metasomatic	1	45.296	1.556	12.27	2.606	2.168	0.028	18.056	11.646	3.655	0	0.088	97.369	93.7465	12.4744
			2	44.89	1.64	11.7	2.816	2.553	0.036	17.915	11.951	3.602	0	0.084	97.187	92.6638	13.9053
			3	45.577	1.057	11.938	2.228	2.713	0.037	18.569	11.814	3.72	0.003	0.09	97.746	92.4925	11.13
			4	45.778	1.761	12.161	2.225	2.512	0.029	18.247	12.092	3.697	0.009	0.096	98.607	92.8952	10.9351
			5	45.817	1.693	11.859	2.243	2.499	0.029	18.158	11.944	3.852	0	0.085	98.179	92.8972	11.2627
			6	45.632	1.754	11.809	2.132	2.584	0.028	17.96	11.93	3.731	0.006	0.113	97.679	92.5985	10.806
			7	45.827	1.508	11.593	2.467	2.55	0.036	18.454	11.882	3.626	0.002	0.059	98.004	92.8706	12.4957
			8	45.41	1.771	11.838	2.518	2.497	0.043	17.985	11.893	3.688	0.002	0.072	97.717	92.8391	12.4907
			9	43.585	1.929	12.319	2.538	2.733	0.023	17.475	12.986	3.747	0.006	0.102	97.443	92.006	12.146
			10	44.565	1.995	12.033	2.485	2.542	0.041	17.922	12.23	3.548	0	0.082	97.443	92.6957	12.1715
			Average	45.2377	1.6664	11.952	2.4258	2.5351	0.033	18.0741	12.0368	3.6866	0.0028	0.0871	97.7374	92.7705	11.9818
			S.D.	0.713622	0.261311	0.240539	0.213489	0.153422	0.00649786	0.308191	0.367535	0.0851407	0.00319026	0.0150514	0.42664	0.43555	0.957375
1827	Harzburgite	Metasomatic	1	43.055	1.356	12.664	3.382	2.457	0.043	18.748	11.569	3.824	0	0.002	97.243	93.2133	15.1974
			2	43.268	1.463	13.073	3.606	2.385	0.042	18.087	11.612	3.443	0	0.004	97.095	93.1743	15.619
			3	44.731	1.185	11.633	3.181	2.575	0.049	18.271	11.693	3.771	0	0	97.273	92.7389	15.5046
			4	44.976	1.227	11.87	3.221	2.341	0.036	18.445	11.797	3.673	0	0.005	97.71	93.4134	15.4044
			5	46.329	1.191	10.632	2.398	2.201	0.041	19.061	11.729	3.504	0	0	97.183	93.9716	13.1457
			6	44.592	1.587	11.644	3.39	2.147	0.033	18.125	11.564	3.783	0	0.019	96.999	93.8255	16.3438
			7	46.224	0.897	11.1	2.981	2.268	0.037	18.949	11.991	3.852	0	0.079	98.378	93.7652	15.2698
			8	46.54	0.925	11.202	2.555	2.697	0.076	19.492	9.19	3.914	0	0.012	96.733	92.8618	13.274
			9	44.561	0.994	12.111	3.003	2.261	0.037	18.175	11.897	3.876	0	0.003	97.049	93.5356	14.2655
			10	45.618	1.205	11.61	2.743	2.441	0.03	18.587	11.665	3.954	0.001	0.054	97.908	93.2001	13.6848
			Average	44.9894	1.203	11.7539	3.046	2.3773	0.0424	18.594	11.4707	3.7594	0.0001	0.0178	97.3571	93.37	14.7709
			S.D.	1.21252	0.224627	0.726296	0.387664	0.170838	0.0129803	0.465878	0.813274	0.170492	0.000316228	0.0269724	0.494641	0.408682	1.09954
1829a	Harzburgite	Metasomatic	1	44.256	1.642	12.344	2.743	2.338	0.028	18.92	11.165	3.496	0.004	0.076	97.012	93.5759	12.9766
			2	43.681	1.563	12.359	2.621	2.228	0.052	18.512	11.285	3.588	0.008	0.104	96.001	93.7327	12.4582
			3	44.924	1.194	10.942	3.03	3.173	0.055	19.909	10.384	3.498	0.011	0.076	97.196	91.866	15.6705
			4	46.354	0.989	11.477	2.796	2.381	0.019	19.067	11.255	3.748	0.008	0.091	98.185	93.5125	14.051
			5	46.094	0.936	11.647	2.817	2.365	0.038	18.579	11.348	3.642	0.001	0.084	97.551	93.3952	13.964
			6	46.348	0.91	11.436	2.685	2.394	0.04	18.651	11.24	3.626	0.005	0.04	97.375	93.3437	13.6109
			7	46.025	1.956	10.699	2.716	2.269	0.045	18.905	11.141	3.434	0.023	0.086	97.299	93.749	14.5555
			8	46.522	1.128	10.973	2.891	2.207	0.034	18.45	11.617	3.587	0.007	0.076	97.492	93.7685	15.0237
			Average	45.5255	1.28975	11.4846	2.78737	2.41938	0.038875	18.8741	11.1794	3.57738	0.008375	0.079125	97.2639	93.3679	14.0388
			S.D.	1.08918	0.385035	0.621663	0.128609	0.31259	0.0120052	0.471945	0.353513	0.0995259	0.0066319	0.0184812	0.616376	0.627915	1.04981
