# Supplementary material for: The formation of giant podiform chromitite by asthenospheric melts in supra-subduction zone environments
Source: Research Square preprint supplement (doi:10.21203/rs.3.rs-225374/v1), 2021-03-10
Supplement: Supplementary file 4 [file be12e7070dd98b723fafde27.xlsx]

## Sheet: Cr isotope composition
Data 4 Cr isotope compositions and contents of peridotites and chromitites from the Luobusa massif
Sample	Lithology	Type	Chromite/WR	Cr (ppm)	δ53Cr (‰)	N	2SD	Cr#
1801	Harzburgite	Normal	WR	2198	-0.14	3	0.05
			Chromite	124389	-0.21	3	0.02	19.68
1830	Harzburgite	Normal	WR	2852	-0.21	3	0.03
			Chromite	165880	-0.38	3	0.03	26.68
1829b	Harzburgite	Normal	WR	2986	-0.15	3	0
			WR_Duplicate	2986	-0.13	3	0.04
1724	Harzburgite	Normal	WR	2424	-0.18	3	0.03
1825	Harzburgite	Metasomatic	WR	2245	-0.11	3	0.04
1827	Harzburgite	Metasomatic	WR	2893	-0.09	3	0.02
			Chromite	294290	-0.14	3	0.04	53.69
1829a	Harzburgite	Metasomatic	WR	2290	-0.08	3	0.05
			Chromite	307800	-0.15	3	0.04	56.34
1810	Harzburgite	Hydrous	WR	2852	0.03	3	0.01
1811a	Dunite	Envelope	WR	3206	0.02	3	0.07
1820	Dunite	Envelope	WR	6554	0.04	3	0.07
1808b	Dunite	Envelope	Chromite	390000	0.03	3	0.02	81.18
1722b	Dunite	Envelope	Chromite	383157	0	3	0.07	79.61
1707a	Chromitite	Disseminated	Chromite		-0.1	3	0.03	80.49
1719b	Chromitite	Disseminated	Chromite		-0.11	3	0.01	80.77
1707c	Chromitite	Massive	Chromite		-0.12	3	0.03	80.79
1719c	Chromitite	Massive	Chromite		-0.1	3	0.03	80.96
1718	Chromitite	Massive	Chromite		-0.14	3	0.03	81.83
JP-1	Standard glass				-0.11	3	0.02
BHVO-2	Standard glass				-0.13	3	0.04
979 (n=19)	Standard glass				0.01	19*3	0.03
