# Supplementary material for: The formation of giant podiform chromitite by asthenospheric melts in supra-subduction zone environments
Source: Research Square preprint supplement (doi:10.21203/rs.3.rs-225374/v1), 2021-03-10
Supplement: Supplementary file 5 [file bef456de7066ce36702b2482.xlsx]

## Sheet: Chromite EPMA data
Table S4 The compilation of EPMA data (wt%) of accessory chromite from Yarlung-Zangbo ophiolite
Location	References	Sample	Lithology	SiO2	TiO2	Al2O3	Cr2O3	FeO	MnO	MgO	CaO	Na2O	K2O	NiO	Total	Cr#
Luobusa	Zhou et al. (1996)1	L20	Harzburgite	0	0.05	27.9	38	20.24	0.35	12.4	0	0	0	0.05	100.1	47.7528
Luobusa	Zhou et al. (1996)	LH2	Harzburgite	0	0.09	23.2	41.1	21.94	0.21	11.4	0	0	0	0.17	98.5	54.313
Luobusa	Zhou et al. (1996)	LH3	Harzburgite	0	0	38.8	27.6	15.95	0.2	15.3	0	0	0	0.37	98.8	32.3111
Luobusa	Zhou et al. (1996)	LH4	Harzburgite	0	0	44.2	22.2	14.87	0.16	16.8	0	0	0	0.26	98.9	25.2082
Luobusa	Zhou et al. (1996)	LH5	Harzburgite	0	0	46.2	20.5	14.98	0.15	17.4	0	0	0	0.18	99.8	22.9442
Luobusa	Zhou et al. (1996)	LH1	Harzburgite	0	0.06	34.7	30.8	19.16	0.38	15.1	0	0	0	0.14	100.9	37.3289
Luobusa	Zhou et al. (1996)	L6	Harzburgite	0	0	42.6	24.2	15.47	0.15	17	0	0	0	0.14	99.8	27.5996
Luobusa	Zhou et al. (1996)	L10	Harzburgite	0	0.01	41.5	26.3	14.24	0.14	17.4	0	0	0	0.11	100	29.8378
Luobusa	Zhou et al. (1996)	L19	Harzburgite	0	0.06	21	47.6	18.05	0.42	11.8	0	0	0	0.03	99.4	60.334
Luobusa	Zhou et al. (1996)	L12	Harzburgite	0	0.03	24.5	41.8	20.44	0.39	12.4	0	0	0	0.01	100	53.3777
Luobusa	Zhou et al. (1996)	L22	Harzburgite	0	0.07	21.3	46.9	19.22	0.42	12.1	0	0	0	0.04	100.4	59.638
Luobusa	Zhou et al. (1996)	L17	Harzburgite	0	0	45	21	15.56	0.1	18	0	0	0	0.15	100.1	23.8477
Luobusa	Zhou et al. (2005)2	H14	Harzburgite	0	0	45.3	21.1	13.65	0.07	17.4	0	0	0	0.28	98.3	23.8133
Luobusa	Zhou et al. (2005)	H2	Harzburgite	0	0.02	38.96	28.23	14.68	0.23	15.93	0	0	0	0.22	98.53	32.716
Luobusa	Zhou et al. (2005)	H1	Harzburgite	0	0.02	22.5	45.1	18.72	0.28	11.68	0	0	0	0.19	99.08	57.3577
Luobusa	Zhou et al. (2005)	H395	Harzburgite	0	0.02	17	50.8	18.7	0.34	10.5	0	0	0	0	98	66.725
Luobusa	Zhou et al. (2005)	S4-3	Harzburgite	0	0.03	30.6	37.5	15.5	0.46	14.6	0	0	0	0.1	99.1	45.1264
Luobusa	Zhou et al. (2005)	S4-3	Harzburgite	0	0.04	29.9	36.2	17.44	0.49	14.8	0	0	0	0.14	99.6	44.8259
Luobusa	Zhou et al. (2005)	S4-3	Harzburgite	0	0	34.5	34.8	15	0.42	15.7	0	0	0	0.08	100.4	40.3657
Luobusa	Zhou et al. (2005)	S4-3	Harzburgite	0	0	35.3	33.4	15.65	0.41	15.5	0	0	0	0.1	100.5	38.8354
Luobusa	Zhou et al. (2005)	S4-4	Harzburgite	0	0	38.1	30.1	15.19	0.32	16.1	0	0	0	0.08	99.6	34.6469
Luobusa	Zhou et al. (2005)	S6	Harzburgite	0	0	44.8	22.3	14.11	0.05	17.1	0	0	0	0.39	98.7	25.0391
Luobusa	Zhou et al. (2005)	S8	Harzburgite	0	0	49.8	17.5	13.47		18	0	0	0	0.34	98.9	19.0815
Luobusa	Zhang et al. (2020)3	12FW81	Harzburgite	0.02975	0.0438571	42.3591	27.6344	13.1476	0.102429	16.878	0.0166	0.0183333	0.00766667	0.174714	100.382	30.4485
Luobusa	Zhang et al. (2020)	12FW83	Harzburgite	0.0115	0.09225	23.3679	46.5124	17.7556	0.165125	12.5389	0.0075	0.013375	0.00375	0.0605	100.529	57.1861
Luobusa	Zhang et al. (2020)	12FW85	Harzburgite	0.05725	0.0455	41.361	25.4975	15.108	0.055	16.5922	0.00475	0.0745	0.0325	0.18225	99.0105	29.2626
Luobusa	Zhang et al. (2020)	12FW91	Harzburgite	0	0.08425	41.7043	28.846	12.9373	0.11225	16.7105	0.00575	0.00225	0.00625	0.1935	100.602	31.7012
Luobusa	Zhang et al. (2020)	12FW92	Harzburgite	0.004625	0.05725	46.4429	23.9195	12.3461	0.110375	17.3615	0.005125	0.005875	0.0045	0.224	100.482	25.6844
Luobusa	Zhang et al. (2020)	12FW93	Harzburgite	0.0351429	0.0801429	43.005	26.474	13.4907	0.113857	16.3889	0.00957143	0.00414286	0.011	0.177429	99.7899	29.2337
Luobusa	Zhang et al. (2020)	12FW94	Harzburgite	0.0835714	0.0882857	38.4566	31.3029	13.8181	0.117714	16.0081	0.0135714	0.00542857	0.0124286	0.185143	100.092	35.3263
Luobusa	Zhang et al. (2020)	12FW95	Harzburgite	0.019625	0.067375	43.302	26.2081	13.375	0.103875	16.6676	0.003625	0.010375	0.005625	0.203	99.9663	28.8837
Luobusa	Zhang et al. (2020)	12FW96	Harzburgite	0.011	0.0714286	41.3574	28.7314	13.8464	0.108429	16.397	0.00242857	0.005	0.00928571	0.174714	100.715	31.7959
Luobusa	Zhang et al. (2020)	12FW97	Harzburgite	0.0535	0.083875	42.7744	26.1695	13.5853	0.11475	16.7051	0.007875	0.020375	0.005	0.195375	99.715	29.1058
Luobusa	Zhang et al. (2020)	12FW98	Harzburgite	0.00775	0.04175	40.4108	28.2832	16.252	0.1495	15.3305	0.0055	0.002	0.0025	0.1835	100.669	31.9573
Luobusa	Zhang et al. (2020)	12FW99	Harzburgite	0.0202857	0.104	39.0201	31.0933	14.2721	0.13	15.6361	0.00714286	0.00685714	0.00614286	0.143571	100.44	34.8419
Luobusa	Zhang et al. (2020)	12FW100	Harzburgite	0.02375	0.083875	32.4744	37.4729	16.048	0.150375	14.4734	0.01025	0.0145	0.007125	0.133125	100.892	43.6411
Luobusa	Zhang et al. (2020)	12FW101	Harzburgite	0.0095	0.08675	37.7202	31.9776	15.4185	0.15	14.9571	0.006125	0.00525	0.007875	0.1495	100.489	36.2607
Luobusa	Zhang et al. (2020)	12FW102	Harzburgite	0.109875	0.06425	42.268	27.4404	13.8795	0.112	16.212	0.005625	0.00225	0.00475	0.176375	100.275	30.345
Luobusa	Zhang et al. (2020)	12FW103	Harzburgite	0.0468333	0.0481667	43.1848	26.8937	13.3473	0.1035	16.5103	0.00966667	0.00383333	0.00233333	0.1775	100.328	29.4733
Luobusa	Zhang et al. (2020)	12FW104	Harzburgite	0.0087	0.0553	42.0802	27.7906	13.5676	0.1103	16.3724	0.0091	0.0027	0.0041	0.1793	100.18	30.7084
Luobusa	Zhang et al. (2020)	12FW105	Harzburgite	0.00266667	0.0706667	43.3999	26.4299	13.1547	0.104556	16.8257	0.00444444	0.00744444	0.001	0.192444	100.193	29.0106
Luobusa	Zhang et al. (2020)	12FW106	Harzburgite	0.0313333	0.0776667	42.48	27.7356	13.628	0.131444	16.494	0.0105556	0.00277778	0.00366667	0.178	100.773	30.4655
Zedang	Xiong et al. (2017)4	ZD11-55	Harzburgite	0	0.11	31.67	38.53	14.89	0.18	14.94	0	0	0	0.11	100.43	44.9463
Zedang	Xiong et al. (2016)5	ZD11-18	Lherzolite	0.04	0.03	50.36	16.45	12.88	0	18.11	0	0	0	0.3	98.17	17.9789
Zedang	Xiong et al. (2016)	ZD11-20	Lherzolite	0	0.06	48.71	20.08	12.79	0.12	17.79	0	0	0	0.29	99.84	21.6689
Zedang	Xiong et al. (2016)	ZD11-21	Lherzolite	0.05	0.04	50.32	17.81	13.11	0.12	18.91	0	0	0	0.28	100.64	19.1925
Zedang	Xiong et al. (2016)	ZD11-22	Lherzolite	0	0.07	49.97	18.33	13.32	0.13	18.81	0	0	0	0.32	100.95	19.7532
Zedang	Xiong et al. (2016)	ZD11-64	Lherzolite	0.01	0.05	46.23	21.72	12.68	0	17.72	0	0	0	0.23	98.64	23.9704
Zedang	Xiong et al. (2016)	ZD11-65	Lherzolite	0	0.05	42.01	26.84	14.21	0.16	16.76	0	0	0	0.21	100.24	30.0079
Zedang	Xiong et al. (2016)	10ZD-6-1	Lherzolite	0	0.04	45.68	22.86	13.47	0	17.17	0	0	0	0.27	99.49	25.1396
Zedang	Xiong et al. (2016)	10ZD-6-7	Lherzolite	0.03	0.05	49.26	19.03	13.54	0.13	18.17	0	0	0	0.25	100.46	20.587
Zedang	Xiong et al. (2016)	10ZD-6-9	Lherzolite	0	0.04	47.77	20.51	13.4	0.13	17.45	0.07	0	0	0.23	99.6	22.3672
Zedang	Xiong et al. (2016)	10ZD-6-18	Lherzolite	0.49	0.03	50.35	15.79	14.14	0.1	18.55	0	0	0	0.34	99.79	17.3858
Zedang	Xiong et al. (2016)	ZED-1	Lherzolite	0	0.05	47.95	20.28	13.42	0.11	18.16	0	0	0	0.3	100.27	22.1072
Zedang	Xiong et al. (2016)	ZD11-46	Lherzolite	0.06	0.04	48.54	19.18	12.84	0	17.75	0	0	0	0.25	98.66	20.9585
Zedang	Xiong et al. (2016)	ZD11-49	Lherzolite	0	0.06	49.28	19.18	12.94	0.12	18.8	0	0	0	0.3	100.68	20.709
Zedang	Xiong et al. (2016)	ZD11-23	Lherzolite	0.04	0.06	46.37	21.66	14.77	0.11	17.74	0	0	0	0.26	101.01	23.865
Zedang	Xiong et al. (2016)	10ZD-6-2	Harzburgite	0.19	0.03	39.9	28.76	14.61	0.15	15.99	0	0	0	0.18	99.81	32.6008
Zedang	Xiong et al. (2016)	10ZD-6-3	Harzburgite	0.04	0.06	31.36	38.09	15.65	0.17	14.79	0	0	0	0.15	100.31	44.9055
Zedang	Xiong et al. (2016)	10ZD-6-17	Harzburgite	0.03	0.05	28.31	40.45	18.14	0.2	13.5	0	0	0	0.13	100.81	48.9488
Zedang	Xiong et al. (2016)	ZD11-45	Harzburgite	0	0.05	34.65	34.51	14.72	0.15	15.83	0	0	0	0.18	100.09	40.0602
Zedang	Xiong et al. (2016)	ZD11-67	Harzburgite	0	0.03	30.98	36.89	16.66	0.18	13.93	0	0	0	0.14	98.81	44.4157
Zedang	Xiong et al. (2016)	ZD11-68	Harzburgite	0.03	0.06	25.06	44.31	18.57	0.2	12.89	0	0	0	0.1	101.22	54.2654
Zedang	Xiong et al. (2016)	ZD11-24	Harzburgite	0	0.07	33.21	34.67	16.96	0.18	14.5	0	0	0	0.16	99.75	41.1956
Zedang	Xiong et al. (2016)	ZD11-25	Harzburgite	0	0.09	20.08	48.01	20.11	0.24	11.39	0	0	0	0.11	100.03	61.6041
Zedang	Xiong et al. (2016)	ZD11-28	Harzburgite	0	0.06	38.89	28.57	17.21	0.15	15.99	0	0	0	0.2	101.07	33.0198
Zedang	Xiong et al. (2016)	ZD11-30	Harzburgite	0	0.07	22.19	46.76	19.46	0	12.04	0	0	0	0.1	100.62	58.5763
Purang	Su et al. (2019)6	PL14-5-1	Lherzolite	0.039	0.061	37.222	30.404	15.139	0.164	15.466	0.008	0.008	0	0.063	98.611	35.4062
Purang	Su et al. (2019)	PL14-5-1	Lherzolite	0	0.092	33.338	34.956	14.417	0.177	15.67	0.007	0	0	0.241	98.9	41.3015
Purang	Su et al. (2019)	PL14-5-1	Lherzolite	0.021	0.024	37.083	30.867	14.355	0.146	15.821	0	0.028	0.004	0.14	98.495	35.8385
Purang	Su et al. (2019)	PL14-5-2	Lherzolite	0.015	0.059	41.432	25.923	14.988	0.164	15.986	0.016	0	0.001	0.191	98.775	29.5706
Purang	Su et al. (2019)	PL14-5-2	Lherzolite	0.036	0.053	37.119	31.311	14.548	0.125	16.097	0.021	0	0.005	0.165	99.487	36.1452
Purang	Su et al. (2019)	PL14-5-2	Lherzolite	0.084	0.058	40.189	26.696	15.016	0.135	15.781	0.021	0	0	0.186	98.217	30.832
Purang	Su et al. (2019)	PL14-5-7	Lherzolite	0	0.083	33.846	34.347	13.849	0.082	15.871	0	0	0.003	0.161	98.249	40.5111
Purang	Su et al. (2019)	PL14-5-7	Lherzolite	0.004	0.021	34.109	32.934	15.948	0.14	15.283	0.001	0	0	0.103	98.561	39.318
Purang	Su et al. (2019)	PL14-5-7	Lherzolite	0.032	0.06	34.526	32.82	15.109	0.156	15.68	0.014	0	0.01	0.205	98.612	38.946
Purang	Su et al. (2019)	PL14-5-7	Lherzolite	0.012	0.057	33.868	34.185	14.329	0.139	16.131	0	0	0.007	0.199	98.927	40.3816
Purang	Su et al. (2019)	PL14-5-7	Lherzolite	0	0.061	34.624	33.091	13.82	0.167	16.414	0.004	0.014	0.005	0.153	98.353	39.0742
Purang	Su et al. (2019)	PL14-5-4	Lherzolite	0	0.086	39.7	28.101	14.322	0.094	16.194	0	0	0	0.157	98.655	32.2031
Purang	Su et al. (2019)	PL14-5-4	Lherzolite	0.045	0.071	35.037	33.598	14.223	0.125	15.879	0.027	0	0	0.164	99.187	39.1539
Purang	Su et al. (2019)	PL14-5-4	Lherzolite	0.032	0.014	34.514	33.491	14.155	0.137	15.538	0.014	0	0.006	0.106	98.073	39.4366
Purang	Su et al. (2019)	PL14-5-4	Lherzolite	0.011	0.01	35.605	32.838	13.972	0.162	15.389	0	0.005	0	0.12	98.133	38.2298
Purang	Su et al. (2019)	PL14-1-1	Harzburgite	0.027	0.013	39.967	26.484	15.041	0.149	16.149	0.014	0.005	0.011	0.188	98.082	30.7801
Purang	Su et al. (2019)	PL14-1-1	Harzburgite	0.008	0.078	41.389	25.532	15.414	0.151	15.967	0.009	0.007	0	0.119	98.689	29.2766
Purang	Su et al. (2019)	PL14-5-3	Harzburgite	0.016	0.056	35.63	32.192	14.158	0.098	15.782	0	0.044	0	0.152	98.128	37.7452
Purang	Su et al. (2019)	PL14-5-3	Harzburgite	0.044	0	34.593	33.459	15.505	0.133	15.323	0.01	0.037	0.013	0.103	99.22	39.3592
Purang	Su et al. (2019)	PL14-5-3	Harzburgite	0.016	0.067	35.129	32.479	15.755	0.162	15.321	0.004	0	0	0.08	99.09	38.288
Purang	Su et al. (2019)	PL14-5-3	Harzburgite	0.037	0.034	34.765	33.064	14.82	0.12	15.601	0.045	0	0	0.081	98.567	38.9581
Purang	Su et al. (2019)	PL14-5-5	Harzburgite	0.029	0.08	21.892	46.002	18.112	0.202	12.088	0.01	0.045	0	0.02	98.48	58.5078
Purang	Su et al. (2019)	PL14-5-5	Harzburgite	0.011	0.034	22.506	45.518	17.542	0.196	12.352	0.012	0.033	0	0.081	98.288	57.5767
Purang	Su et al. (2019)	PL14-5-5	Harzburgite	0.102	0.038	20.543	47.095	17.858	0.179	12.453	0.082	0	0	0.052	98.402	60.605
Purang	Su et al. (2019)	PL14-5-9	Harzburgite	0.048	0.101	24.007	43.743	17.728	0.199	12.387	0	0	0.022	0.068	98.303	55.0101
Purang	Su et al. (2019)	PL14-5-9	Harzburgite	0	0.052	25.444	42.643	17.964	0.176	12.865	0	0	0	0.076	99.22	52.9335
Purang	Su et al. (2019)	PL14-5-9	Harzburgite	0.046	0.037	24.006	44.104	17.85	0.149	12.237	0	0.039	0	0.085	98.553	55.2144
Purang	Su et al. (2019)	PL14-5-16	Harzburgite	0.038	0.055	24.567	42.213	20.261	0.222	11.679	0.019	0	0	0.097	99.187	53.5544
Purang	Su et al. (2019)	PL14-5-16	Harzburgite	0.061	0.11	26.345	42.368	17.254	0.112	12.698	0	0	0	0.05	98.999	51.9043
Purang	Su et al. (2019)	PL14-5-16	Harzburgite	0.02	0.068	26.561	40.996	18.305	0.215	12.304	0.001	0.001	0.029	0.078	98.578	50.878
Purang	Su et al. (2019)	PL14-2-1	Harzburgite	0.073	0.085	40.028	24.641	16.489	0.11	15.605	0.003	0.003	0.009	0.259	97.312	29.2334
Purang	Su et al. (2019)	PL14-5-6	Harzburgite	0	0.048	39.323	28.502	14.608	0.108	16.122	0.006	0.01	0	0.137	98.873	32.7229
Purang	Su et al. (2019)	PL14-5-6	Harzburgite	0	0.025	41.013	26.409	14.817	0.127	16.281	0.013	0.004	0	0.212	98.911	30.1726
Purang	Su et al. (2019)	PL14-5-6	Harzburgite	0.043	0.023	41.4	25.371	15.882	0.143	16.019	0.018	0	0	0.212	99.114	29.1403
Purang	Su et al. (2019)	PL14-5-6	Harzburgite	0.042	0.034	40.26	26.89	14.626	0.103	16.272	0	0.019	0	0.212	98.458	30.9489
Purang	Su et al. (2019)	PL14-5-6	Harzburgite	0.339	0.001	46.226	20.827	12.227	0.12	17.9	0.1	0.022	0.007	0.335	98.104	23.2152
Purang	Su et al. (2019)	PL14-5-6	Harzburgite	0.242	0.023	45.56	20.751	12.595	0.073	17.672	0.227	0.003	0	0.232	97.387	23.4093
Purang	Su et al. (2019)	PL14-5-13	Harzburgite	0.367	0.056	26.219	40.315	20.099	0.183	11.741	0.018	0.006	0	0.115	99.119	50.7832
Purang	Su et al. (2019)	PL14-5-13	Harzburgite	0.023	0.061	22.235	45.957	19.378	0.212	12.301	0	0.001	0.001	0.136	100.311	58.1061
Purang	Su et al. (2019)	PL14-5-13	Harzburgite	0.069	0.029	23.14	44.22	19.679	0.153	11.746	0.004	0	0.005	0.116	99.163	56.1858
Purang	Su et al. (2019)	PL14-5-13	Harzburgite	0.007	0.052	23.199	43.864	20.062	0.19	11.561	0	0.016	0	0.1	99.053	55.924
Purang	Su et al. (2019)	PL14-5-13	Harzburgite	0.036	0.056	22.945	44.512	18.766	0.244	12.353	0.01	0.076	0.039	0.098	99.163	56.5558
Purang	Su et al. (2019)	PL14-5-13	Harzburgite	0	0.065	23.834	44.524	18.663	0.186	12.099	0.025	0	0.01	0.057	99.472	55.6263
Purang	Su et al. (2019)	PL14-5-11	Harzburgite	0.042	0.057	40.931	27.112	14.329	0.117	16.093	0	0.005	0.014	0.196	98.896	30.7716
Purang	Su et al. (2019)	PL14-5-11	Harzburgite	0.034	0.031	41.654	25.802	14.204	0.092	16.533	0.013	0	0	0.206	98.569	29.3623
Purang	Su et al. (2019)	PL14-5-11	Harzburgite	0.028	0.017	37.85	29.678	14.426	0.15	16.045	0.026	0.007	0	0.17	98.397	34.4765
Purang	Su et al. (2019)	PL14-5-11	Harzburgite	0.021	0.035	38.273	29.953	14.327	0.124	16.071	0	0.002	0.023	0.21	99.039	34.4338
Purang	Su et al. (2019)	PL14-4-1	Harzburgite	0	0.045	37.058	30.196	15.627	0.168	14.849	0.016	0.006	0	0.102	98.073	35.3502
Purang	Su et al. (2019)	PL14-4-1	Harzburgite	0	0.036	36.393	31.083	16.241	0.159	14.77	0.015	0	0.009	0.173	98.908	36.4329
Purang	Su et al. (2019)	PL14-4-1	Harzburgite	0	0.055	36.669	30.988	16.255	0.162	14.533	0	0	0	0.203	98.873	36.1874
Purang	Su et al. (2019)	PL14-4-1	Harzburgite	0	0.045	34.743	33.524	15.052	0.099	14.834	0.004	0	0	0.178	98.527	39.3023
Purang	Gong et al. (2019)7	PL1201-4	Lherzolite	0.18	0.07	47.97	19.25	13.51	0.1	18.14	0.02	0	0.01	0.25	99.5	21.2157
Purang	Gong et al. (2019)	PL1202-2b	Lherzolite	0.21	0.06	49.71	16.76	12.64	0.14	17.93	0.01	0.01	0	0.3	97.77	18.4505
Purang	Gong et al. (2019)	PL1202-3	Lherzolite	0.1	0.02	49.13	1.21	0.2	0.02	0.18	0.01	0.01	0	0.02	50.9	1.62583
Purang	Gong et al. (2019)	PL1206-7	Lherzolite	0.25	0.04	51.53	16.54	13.75	0.13	17.93	0.02	0.01	0	0.31	100.51	17.7221
Purang	Gong et al. (2019)	PL14C3	Lherzolite	0	0.05	49.59	14.81	12.76	0.09	18.54	0.03	0.01	0.01	0.3	96.19	16.6951
Purang	Gong et al. (2019)	PL14C5	Lherzolite	0.04	0.04	44.81	17.4	13.05	0.09	18.24	0.01	0	0.01	0.31	94	20.6711
Purang	Gong et al. (2019)	PL14C5	Lherzolite	0.21	0.06	44.72	22.04	14.67	0.13	16.82	0	0.07	0.02	0.23	98.97	24.853
Purang	Gong et al. (2019)	PL1420-4	Lherzolite	0.02	0.05	51.93	15.66	12.31	0.11	19.02	0.01	0.01	0.01	0.32	99.45	16.8304
Purang	Gong et al. (2019)	PL14401-1	Lherzolite	0.03	0.04	44.43	22.16	14.23	0.12	16.72	0.01	0.04	0.01	0.21	98	25.0766
Purang	Gong et al. (2019)	PL14401-1	Lherzolite	0.14	0.06	41.81	24.68	13.63	0.12	16.6	0.02	0.06	0.01	0.17	97.3	28.3727
Purang	Gong et al. (2016)8	PL1102C	Lherzolite	0.12	0.03	39.28	27.74	15.53	0.13	15.49	0.01	<0.01	<0.01	0.15	98.48	32.153
Purang	Gong et al. (2016)	PL1104B	Lherzolite	0.01	0.04	43.23	24.09	14.35	0.16	16.39	0.01	0.01	<0.01	0.21	98.51	27.2169
Purang	Gong et al. (2016)	PL1104F	Lherzolite	0.07	0.02	42.52	24.33	14.65	0.13	16.53	0.01	<0.01	0.01	0.21	98.47	27.7445
Purang	Gong et al. (2016)	PL1104H	Lherzolite	0.15	0.02	46.09	20.4	14.79	0.14	16.72	0.06	0.02	<0.01	0.24	98.59	22.9
Purang	Gong et al. (2016)	PL1202-2	Lherzolite	0.23	0.06	49.96	16.6	12.6	0.14	17.94	0.01	0.01	<0.01	0.31	97.85	18.2317
Purang	Gong et al. (2016)	PL1210-1	Lherzolite	0.07	0.04	38.44	28.71	14.9	0.19	15.82	0.02	0.01	0.01	0.19	98.38	33.3864
Purang	Gong et al. (2016)	PL1102A	Cpx-Harzburgite	0.01	0.04	36.7	30.21	15.99	0.18	15.25	0.01	0.02	0.01	0.18	98.59	35.583
Purang	Gong et al. (2016)	PL1102G	Cpx-Harzburgite	0.13	0.03	34.72	32.31	16.48	0.15	14.58	<0.01	<0.01	<0.01	0.16	98.57	38.4416
Purang	Gong et al. (2016)	PL1102H	Cpx-Harzburgite	0.07	0.03	39.26	27.56	15.57	0.15	15.57	<0.01	0.01	<0.01	0.17	98.38	32.0223
Purang	Gong et al. (2016)	PL1103A	Cpx-Harzburgite	0.04	0.03	37.55	29.14	16.15	0.18	15.17	0.01	0.02	0.01	0.16	98.45	34.2433
Purang	Gong et al. (2016)	PL1103B	Cpx-Harzburgite	0.26	0.03	39.97	26.65	15.54	0.14	15.75	0.04	0.01	<0.01	0.17	98.56	30.9118
Purang	Gong et al. (2016)	PL1104D	Cpx-Harzburgite	0.28	0.03	42.48	22.82	16.09	0.14	16.07	0.03	0.02	<0.01	0.21	98.18	26.4968
Purang	Gong et al. (2016)	PL1211-3	Cpx-Harzburgite	0.05	0.04	32.87	34.76	15.56	0.19	14.85	0.01	0.03	0.01	0.12	98.47	41.5081
Purang	Gong et al. (2016)	PL1301D	Cpx-Harzburgite	0.03	0.03	31.41	36.68	16.75	0.25	14.44	0.02	0.01	0.01	0.12	99.71	43.935
Purang	Gong et al. (2016)	PL1102E	Cpx-Harzburgite	0.04	0.05	22.1	45.44	19.3	0.2	11.49	0.01	0.01	<0.01	0.08	98.72	57.9789
Purang	Gong et al. (2016)	PL1205-2	Cpx-Harzburgite	0.03	0.07	28.57	39.47	16.52	0.21	14.11	0.01	<0.01	<0.01	0.12	99.12	48.1078
Purang	Gong et al. (2016)	PL1209-5	Cpx-Harzburgite	0.09	0.07	18.6	49.79	20.34	0.3	10.86	0.01	0.02	0.01	0.1	100.17	64.2388
Purang	Gong et al. (2016)	PL1309B	Cpx-Harzburgite	0.03	0.04	23.44	45.03	18	0.25	12.57	0.01	0.02	<0.01	0.05	99.42	56.3155
Purang	Liu et al. (2014)9	PL02-3	Harzburgite	0.02	0.06	39.2	28.39	16.65	0.14	15.6	0.01	0.01	0.01	0.2	100.42	32.7052
Purang	Liu et al. (2014)	PL02-5	Harzburgite	0.03	0.04	38.96	28.11	17.19	0.12	15.33	0	0.01	0	0.2	99.99	32.6223
Purang	Liu et al. (2014)	PL03-2	Harzburgite	0.03	0.04	32.39	36.01	17.41	0.16	14.27	0	0	0	0.13	100.82	42.7279
Purang	Liu et al. (2014)	PL03-9	Harzburgite	0.02	0.08	38.38	30.75	15.63	0.13	15.84	0	0.01	0	0.17	101.01	34.9655
Purang	Liu et al. (2014)	PL03-10	Harzburgite	0.04	0.05	39.41	29.18	16.1	0.12	15.6	0.01	0.01	0.01	0.17	100.65	33.1936
Purang	Liu et al. (2014)	PL07-7	Harzburgite	0.02	0.03	38.84	30	14.76	0.12	15.95	0.01	0.04	0.01	0.16	100.28	34.1378
Purang	Liu et al. (2014)	PL07-8	Harzburgite	0.02	0.06	38.56	29.36	16.22	0.11	15.91	0.01	0.03	0	0.17	100.46	33.8163
Purang	Liu et al. (2014)	PL08-5	Harzburgite	0.01	0.05	19.93	46.72	22.33	0.2	10.69	0.01	0.02	0.01	0.09	100.05	61.1361
Purang	Liu et al. (2014)	PL1122	Harzburgite	0.02	0.05	40.76	28.07	15.04	0.12	15.54	0.01	0.01	0.01	0.19	99.82	31.6067
Purang	Liu et al. (2014)	PL1126	Harzburgite	0.03	0.18	32.8	38.01	14.26	0.11	15.05	0.01	0.02	0	0.13	100.59	43.7458
Purang	Liu et al. (2014)	PL1136	Harzburgite	0.03	0.14	28.67	36.15	23.08	0.18	11.7	0.01	0.01	0	0.14	100.12	45.8326
Purang	Liu et al. (2014)	PL1137	Harzburgite	0.05	0.08	32.81	32.64	21.37	0.18	12.63	0.01	0.02	0	0.13	99.91	40.0327
Purang	Liu et al. (2014)	PL1138	Harzburgite	0.03	0.11	30.35	36.22	20.69	0.15	12.87	0.01	0	0	0.12	100.56	44.4704
Purang	Liu et al. (2014)	PL1139	Harzburgite	0.21	0.1	31.11	34.47	21.5	0.18	12.54	0.01	0.01	0.01	0.12	100.26	42.6451
Purang	Liu et al. (2014)	PL1140	Harzburgite	0.04	0.09	31.7	34.13	21.3	0.17	12.55	0.01	0.01	0.01	0.14	100.16	41.9446
Purang	Liu et al. (2014)	PL1141	Harzburgite	0.01	0.04	37.31	33.25	14.76	0.11	15.68	0.01	0.01	0.01	0.14	101.33	37.423
Purang	Liu et al. (2014)	PL1142	Harzburgite	0.06	0.04	37.27	32.26	14.7	0.12	14.96	0.02	0.04	0.01	0.15	99.63	36.7428
Purang	Liu et al. (2014)	PL1143	Harzburgite	0	0.03	37.92	31.9	14.97	0.12	14.76	0.01	0	0	0.15	99.87	36.0826
Purang	Liu et al. (2014)	PL1150	Harzburgite	0.04	0.05	31.45	37.14	16.65	0.12	14.59	0.01	0.01	0	0.13	100.2	44.2108
Dazhuqu	Liu et al. (2019)10	14DZQ08	Harzburgite	0.05125	0.05325	26.5736	41.6556	18.616	0	12.6762	0.0115	0.01125	0.0015	0.09375	99.744	51.265
Dazhuqu	Liu et al. (2019)	14DZQ09	Lherzolite	0.0188	0.028	38.9678	29.0658	16.3628	0.1632	15.3658	0.0046	0.0098	0.0018	0.1648	100.153	33.357
Dazhuqu	Liu et al. (2019)	14DZQ11	Lherzolite	0.08075	0.01725	45.5504	22.4129	14.7926	0	16.7581	0.003625	0.0015	0.005625	0.20925	99.832	24.8227
Dazhuqu	Liu et al. (2019)	14DZQ12	Lherzolite	0.0426	0.0242	43.9984	24.0276	15.9324	0.1282	16.0472	0.0044	0.0146	0.0014	0.2316	100.453	26.8184
Dazhuqu	Liu et al. (2019)	14DZQ13	Lherzolite	0.0448	0.0396	44.3514	24.1112	14.7728	0.1282	16.6814	0.0118	0.0114	0.0038	0.2086	100.365	26.7298
Dazhuqu	Liu et al. (2019)	14DZQ14	Lherzolite	0.031	0.0396	40.659	27.5954	16.0646	0.1572	15.7722	0.0044	0.0098	0.005	0.1698	100.508	31.2925
Dazhuqu	Liu et al. (2019)	14DZQ15	Lherzolite	0.0332	0.0264	40.613	27.7662	15.769	0.173	15.7568	0.0112	0.0136	0.0024	0.1718	100.337	31.4497
Dazhuqu	Liu et al. (2019)	14DZQ16	Harzburgite	0.037	0.017	46.159	22.3483	15.0143	0.122	17.0423	0	0.00966667	0.008	0.215667	100.973	24.5224
Dazhuqu	Liu et al. (2019)	14DZQ17	Harzburgite	0.025	0.0455	35.1403	33.2595	17.3577	0.177	14.6242	0.0085	0.016	0.002	0.1395	100.795	38.843
Dazhuqu	Liu et al. (2019)	14DZQ18	Harzburgite	0.103444	0.0416667	27.8492	40.4077	18.5651	0	12.8707	0.0122222	0.00633333	0.002	0.0812222	99.9396	49.3327
Dazhuqu	Liu et al. (2019)	14DZQ19	Lherzolite	0.0206	0.037	44.5426	24.3234	14.6946	0.1234	16.8918	0.005	0.0098	0.002	0.223	100.873	26.8172
Dazhuqu	Liu et al. (2019)	14DZQ71	Harzburgite	0.029	0.074	33.5328	34.9856	17.454	0.1636	14.4056	0.0046	0.0174	0.0024	0.1102	100.779	41.1808
Dazhuqu	Liu et al. (2019)	14DZQ72	Harzburgite	0.0248	0.0432	41.7074	27.2276	14.6324	0.1364	16.4254	0.003	0.0202	0.0038	0.1846	100.409	30.4628
Dazhuqu	Liu et al. (2019)	14DZQ73	Harzburgite	0.037	0.0632	22.2784	47.0584	19.6402	0.222	11.7336	0.0008	0.0184	0.0038	0.0702	101.126	58.6342
Dazhuqu	Liu et al. (2019)	14DZQ74	Harzburgite	0.0136	0.045	40	29.4028	15.3264	0.1354	16.0206	0.006	0.0016	0.0044	0.162	101.118	33.0329
Dazhuqu	Liu et al. (2019)	14DZQ75	Harzburgite	0.0594	0.0866	24.9582	44.4554	18.2742	0	12.3948	0.0094	0.0082	0.0044	0.0802	100.331	54.4476
Dazhuqu	Liu et al. (2019)	14DZQ76	Harzburgite	0.029	0.0295	36.2673	32.739	16.1517	0.176	15.1682	0.0055	0.02675	0.00575	0.15275	100.751	37.7246
Dazhuqu	Liu et al. (2019)	14DZQ77	Harzburgite	0.0225	0.0605	24.564	44.1418	19.7718	0.22025	12.2255	0.01375	0.00975	0.00375	0.1035	101.137	54.6668
Dazhuqu	Liu et al. (2019)	14DZQ78	Harzburgite	0.0408	0.1114	15.4478	52.7424	22.098	0.2514	9.9412	0.0112	0.0128	0.0028	0.0618	100.722	69.6153
Dazhuqu	Liu et al. (2019)	14DZQ79	Harzburgite	0.0476	0.0648	25.407	42.3496	20.1986	0	12.2882	0.0024	0.0028	0.0076	0.0906	100.459	52.7977
Dazhuqu	Liu et al. (2019)	14DZQ80	Harzburgite	0.0322	0.0758	19.2998	48.6476	21.8544	0.26	10.9384	0.008	0.0244	0.0052	0.0774	101.223	62.8456
Dazhuqu	Liu et al. (2019)	14DZQ81	Harzburgite	0.0386667	0.089	22.372	46.206	20.35	0.223667	11.8107	0.00333333	0.006	0	0.0416667	101.141	58.0881
Dazhuqu	Liu et al. (2019)	14DZQ82	Harzburgite	0.0462	0.051	28.1404	40.8732	18.7328	0.1994	12.9902	0.0022	0.0206	0.0012	0.0888	101.146	49.3591
Dazhuqu	Liu et al. (2019)	14DZQ83	Harzburgite	0.077	0.0248	39.6212	28.63	15.6236	0	15.508	0.0024	0.0058	0.0052	0.1856	99.6836	32.6553
Dazhuqu	Liu et al. (2019)	14DZQ84	Harzburgite	0.0858	0.0402	39.9884	28.6246	15.912	0.1544	15.716	0.007	0.0136	0.0018	0.1626	100.706	32.4486
Dazhuqu	Liu et al. (2019)	14DZQ86	Lherzolite	0.172	0.0484	41.5598	26.7696	14.9154	0	15.9938	0.0036	0.003	0.0042	0.1716	99.6414	30.1793
Dazhuqu	Liu et al. (2019)	14DZQ88	Lherzolite	0.0214	0.0438	43.323	25.2918	14.8634	0	16.1802	0	0.0026	0.0032	0.1876	99.917	28.1484
Dazhuqu	Liu et al. (2019)	14DZQ90	Lherzolite	0.0216667	0.0371667	42.429	26.6192	15.2033	0.140333	16.3288	0.003	0.013	0.00616667	0.187333	100.989	29.6273
Dazhuqu	Liu et al. (2019)	14DZQ91	Lherzolite	0.606	0.035	42.026	25.3662	15.5196	0.1496	16.1048	0.01	0.0252	0.007	0.189	100.038	28.8275
Dazhuqu	Liu et al. (2019)	14DZQ92	Harzburgite	0.001	0.079	30.2	38.544	19.365	0.22	12.932	0	0.002	0	0.116	101.459	46.134
Dazhuqu	Liu et al. (2019)	14DZQ93	Harzburgite	0.018	0.055	28.287	41.267	18.388	0.19	13.11	0.034	0.018	0	0.08	101.447	49.4688
Dazhuqu	Liu et al. (2019)	14DZQ94	Harzburgite	0.0315	0.04825	40.2575	28.4942	15.7885	0.162	15.7112	0.0045	0.02475	0.00225	0.17675	100.701	32.2021
Dazhuqu	Liu et al. (2019)	14DZQ95	Lherzolite	0.0354	0.0356	35.8828	32.4564	16.7512	0.1668	14.7926	0.0064	0.0088	0.0076	0.138	100.282	37.7713
Zhongba (Yungbwa)	Dai et al. (2011)11	ZB067	Harzburgite	0.01	0.01	40.19	26.93	15.83	0	15.88	0	0.01	0	0.12	98.98	31.0178
Zhongba (Yungbwa)	Dai et al. (2011)	ZB068	Harzburgite	0.04	0.05	23.67	44.56	18.42	0	12.34	0	0.03	0	0.13	99.24	55.8166
Zhongba (Yungbwa)	Dai et al. (2011)	ZB069	Harzburgite	0.05	0.01	37.84	30.58	15.18	0	15.27	0.01	0	0	0.11	99.05	35.1619
Zhongba (Yungbwa)	Dai et al. (2011)	ZB070	Harzburgite	0.03	0	33.67	34.41	16.62	0	15.1	0	0	0	0.14	99.97	40.681
Zhongba (Yungbwa)	Dai et al. (2011)	ZEOS-01–02	Harzburgite	0.05	0.02	25.92	42.94	17.97	0	12.97	0	0	0	0.06	99.93	52.6446
Zhongba (Yungbwa)	Dai et al. (2011)	ZEOS-01–05	Harzburgite	0.04	0.02	37.73	30.32	14.36	0	15.62	0	0	0	0.13	98.22	35.0338
Zhongba (Yungbwa)	Dai et al. (2011)	ZEOS-01–06	Harzburgite	0.04	0.04	35.49	32.16	16	0	14.68	0	0	0	0.18	98.59	37.8144
Zhongba (Yungbwa)	Dai et al. (2011)	ZEOS-02–01	Harzburgite	0.02	0.02	29.87	38.63	17.37	0	13.61	0	0.01	0	0.05	99.58	46.4626
Zhongba (Yungbwa)	Dai et al. (2011)	ZEOS-02–03	Harzburgite	0.01	0.05	30.64	38.08	15.6	0	14.89	0	0.02	0	0.1	99.39	45.4743
Zhongba (Yungbwa)	Dai et al. (2011)	ZEOS-02–04	Harzburgite	0.02	0.01	33.94	34.22	15.82	0	14.69	0.01	0.04	0	0.1	98.85	40.3551
Zhongba (Yungbwa)	Liu et al. (2012)12	GHP-62	Harzburgite	0.08	0.04	39.71	28.78	14.41	0.14	16.38	0	0	0	0.16	99.7	32.721
Zhongba (Yungbwa)	Liu et al. (2012)	GHP-63	Harzburgite	0.01	0.04	40.6	27.39	14.92	0.14	16.3	0	0	0	0.18	99.58	31.1633
Zhongba (Yungbwa)	Liu et al. (2012)	GHP-74	Harzburgite	0.05	0.05	40.9	27.64	13.83	0.14	16.66	0	0	0	0.18	99.45	31.2003
Zhongba (Yungbwa)	Liu et al. (2012)	GHP-91	Harzburgite	0.04	0.04	40.15	28.5	15.11	0.14	15.77	0	0	0	0.16	99.91	32.2649
Zhongba (Yungbwa)	Liu et al. (2012)	GHP-92	Harzburgite	0.02	0.03	41.07	27.42	15.27	0.13	15.84	0	0	0	0.16	99.94	30.9403
Zhongba (Yungbwa)	Liu et al. (2012)	GHP-L1	Harzburgite	0.03	0.03	41.53	26.38	15.25	0.13	15.99	0	0	0	0.16	99.5	29.8863
Zhongba (Yungbwa)	Liu et al. (2012)	GHP-81	Harzburgite	0.03	0.07	23.16	44.43	19.43	0.23	12.01	0	0	0	0.08	99.44	56.2812
Zhongba (Yungbwa)	Liu et al. (2012)	GHP-82	Harzburgite	0.02	0.06	25.14	42.49	19.05	0.23	12.49	0	0	0	0.08	99.56	53.1434
Zhongba (Yungbwa)	Liu et al. (2012)	GHP-83	Harzburgite	0.05	0.06	24.3	42.93	19.32	0.2	12.41	0.01	0	0	0.08	99.36	54.2444
Zhongba (Yungbwa)	Liu et al. (2012)	GHP-84	Harzburgite	0.05	0.05	25.79	41.45	18.98	0.19	12.79	0.01	0	0	0.09	99.4	51.8889
Zhongba (Yungbwa)	Liu et al. (2012)	GHP-86	Harzburgite	0.06	0.08	30.05	33.69	23.47	0.2	11.57	0	0	0	0.15	99.27	42.9334
Zhongba (Yungbwa)	Liu et al. (2012)	GHP-L3	Harzburgite	0.04	0.06	22.72	43.52	20.73	0.23	11.61	0	0	0	0.09	99	56.2439
Luqu	Zhang et al. (2017)13	13LQ24	Harzburgite	0.01675	0.02975	30.65	38.3216	16.5479	0.14325	13.9984	0.0115	0.012625	0.003625	0.114	99.8506	45.6231
Luqu	Zhang et al. (2017)	13LQ25	Harzburgite	0.005375	0.031125	33.9532	34.627	16.2928	0.163625	14.7083	0.00575	0.00175	0.004625	0.12775	99.9224	40.6306
Luqu	Zhang et al. (2017)	13LQ26	Harzburgite	0.0145	0.04625	34.3306	34.8696	16.2338	0.143375	14.6984	0.0085	0.039875	0.0065	0.131375	100.527	40.5324
Luqu	Zhang et al. (2017)	13LQ27	Harzburgite	0.09575	0.04425	32.3472	36.3361	16.9877	0.171	14.1174	0.023	0.042125	0.019125	0.1325	100.323	42.9811
Luqu	Zhang et al. (2017)	13LQ28	Harzburgite	0.008	0.05875	36.393	33.8158	14.7683	0.148375	15.6314	0.01175	0.01825	0.006875	0.147625	101.01	38.4058
Luqu	Zhang et al. (2017)	13LQ29	Harzburgite	0.029	0.05825	33.8089	35.8651	15.5926	0.1405	14.9022	0.017375	0.024625	0.005125	0.12375	100.571	41.5842
Luqu	Zhang et al. (2017)	13LQ30	Harzburgite	0.037375	0.056	35.5289	33.2336	15.7664	0.144625	14.8539	0.00825	0.024	0.00275	0.148125	99.8047	38.5637
Luqu	Zhang et al. (2017)	13LQ32	Harzburgite	0.023	0.04025	30.0736	38.3844	16.3886	0.139875	13.9834	0.00175	0.015	0.0075	0.1525	99.211	46.1351
Luqu	Zhang et al. (2017)	13LQ33	Harzburgite	0.035125	0.036375	33.6119	35.6106	15.026	0.127875	14.9007	0.01825	0.022625	0.00575	0.128875	99.5311	41.5532
Luqu	Zhang et al. (2017)	13LQ34	Harzburgite	0.02625	0.096875	37.5271	31.6001	15.0206	0.110625	15.4576	0.01175	0.007625	0.004	0.155125	100.019	36.105
Luqu	Zhang et al. (2017)	13LQ35	Harzburgite	0.02	0.03325	33.6805	35.5892	15.07	0.10275	15.3865	0.0115	0.012625	0.011625	0.1665	100.085	41.4891
Luqu	Zhang et al. (2017)	13LQ36	Harzburgite	0.012875	0.099125	22.4413	46.5947	18.4247	0.1345	12.0991	0.003	0.01225	0.003125	0.044625	99.8732	58.2168
Luqu	Zhang et al. (2017)	13LQ37	Harzburgite	0.018	0.053625	21.6019	46.7689	18.4413	0.189125	12.1595	0.008375	0.035125	0.0035	0.062	99.346	59.2312
Luqu	Zhang et al. (2017)	13LQ38	Harzburgite	0.042875	0.04575	25.0921	43.7645	17.8609	0.182	12.4814	0.008125	0.009625	0.005125	0.06025	99.5542	53.9259
Luqu	Zhang et al. (2017)	13LQ39	Harzburgite	0.053875	0.056625	26.4954	43.7722	15.8238	0.150875	14.0456	0.01025	0.027	0.003125	0.11575	100.557	52.5758
Luqu	Zhang et al. (2017)	13LQ40	Harzburgite	0.058	0.0588333	26.7382	42.9393	16.5412	0.156667	13.5093	0.0235	0.00766667	0.00266667	0.109	100.148	51.8688
Luqu	Zhang et al. (2017)	13LQ41	Harzburgite	0.0678333	0.0371667	31.69	37.4435	16.5445	0.155333	14.0473	0.0108333	0.0125	0.0035	0.120333	100.134	44.224
Luqu	Zhang et al. (2017)	13LQ42	Harzburgite	0.043	0.0228333	30.924	38.798	15.9577	0.1015	14.6117	0.0148333	0.0191667	0.00266667	0.117667	100.613	45.7088
Luqu	Zhang et al. (2017)	13LQ47	Harzburgite	0.0615	0.0126667	37.4123	31.9357	15.3838	0.153167	15.0722	0.021	0.0111667	0.003	0.148667	100.218	36.4199
Luqu	Zhang et al. (2017)	13LQ48	Harzburgite	0.033	0.048	35.734	33.8555	14.8263	0.1165	15.3887	0.027	0.0371667	0.00466667	0.162	100.235	38.8669
Luqu	Zhang et al. (2017)	13LQ49	Harzburgite	0.0188333	0.0455	34.9588	34.4433	14.4898	0.121167	15.9457	0.012	0.0311667	0.0111667	0.185667	100.275	39.801
Luqu	Zhang et al. (2017)	13LQ50	Harzburgite	0.0225	0.049	34.2068	35.4725	14.9798	0.115	15.2817	0.00816667	0.000833333	0.000666667	0.153667	100.294	41.0336
Luqu	Zhang et al. (2017)	13LQ51	Harzburgite	0.0185	0.0345	34.9577	34.1424	15.2234	0.15875	15.5878	0.011375	0.002625	0.00075	0.1365	100.275	39.5917
Luqu	Zhang et al. (2017)	13LQ52	Harzburgite	0.04525	0.04525	34.6896	34.9697	14.7369	0.131	15.287	0.01325	0.013	0.0035	0.157375	100.094	40.3509
Luqu	Zhang et al. (2017)	13LQ56	Harzburgite	0.082	0.034	33.2692	36.6534	15.2954	0.142	15.0183	0.007625	0.011375	0.006125	0.127375	100.651	42.506
Luqu	Zhang et al. (2017)	13LQ57	Harzburgite	0.063625	0.0415	36.1556	33.0247	15.2281	0.158875	15.2031	0.015	0.01875	0.00725	0.13425	100.053	38.0015
Luqu	Zhang et al. (2017)	13LQ58	Harzburgite	0.0725	0.0568333	31.6703	37.4498	15.0942	0.1405	14.7518	0.0163333	0.019	0.000333333	0.144667	99.4192	44.2435
Luqu	Zhang et al. (2017)	13LQ59	Harzburgite	0.049	0.0458333	33.9957	34.5677	15.5523	0.118333	15.348	0.00983333	0.0645	0.00533333	0.163667	99.9387	40.5591
Luqu	Zhang et al. (2017)	13LQ60	Harzburgite	0.0553333	0.0421667	33.986	34.8728	15.2398	0.1365	15.355	0.00983333	0.017	0.00216667	0.1595	99.8793	40.7781
Luqu	Zhang et al. (2017)	13LQ61	Harzburgite	0.010875	0.030625	34.8979	33.9179	15.0053	0.13575	15.1661	0.001875	0.008875	0.005625	0.123375	99.3075	39.4749
Luqu	Zhang et al. (2017)	13LQ62	Harzburgite	0.01825	0.044125	34.642	33.888	15.1274	0.12175	15.1	0.006625	0.019125	0.00575	0.1395	99.1143	39.6298
Luqu	Zhang et al. (2017)	13LQ63	Harzburgite	0.011625	0.03825	36.1989	33.1664	14.7774	0.128625	15.38	0.013625	0.02725	0.002875	0.114375	99.8623	38.0742
Luqu	Zhang et al. (2017)	13LQ64-2	Harzburgite	0.04525	0.05375	25.6821	42.9684	17.3099	0.160875	13.1876	0.010625	0.0135	0.003625	0.08625	99.5219	52.8908
Luqu	Zhang et al. (2017)	13LQ65	Harzburgite	0.029	0.030875	35.282	33.9393	14.7073	0.113875	15.5702	0.007875	0.01075	0.011	0.152625	99.8581	39.2287
Luqu	Zhang et al. (2017)	13LQ66	Harzburgite	0.042125	0.049875	35.5604	33.6504	15.1144	0.117	15.4288	0.012	0.032625	0.0105	0.152125	100.174	38.8383
Luqu	Zhang et al. (2017)	13LQ67	Harzburgite	0.053125	0.031125	29.4758	39.0374	17.4144	0.15575	13.4348	0.0025	0.044375	0.0045	0.0815	99.7392	47.0545
Luqu	Zhang et al. (2017)	13LQ68	Harzburgite	0.029625	0.036375	34.2927	34.2925	15.5368	0.120125	14.9187	0.00925	0.006125	0.002	0.1255	99.3713	40.1573
Luqu	Zhang et al. (2017)	13LQ69	Harzburgite	0.1045	0.042125	21.0676	47.5802	18.4251	0.16675	12.0219	0.011125	0.016125	0.00575	0.0595	99.5026	60.2471
Luqu	Zhang et al. (2017)	13LQ70	Harzburgite	0.064125	0.052625	24.7375	43.9968	18.6769	0.173	12.4896	0.014625	0.0215	0.002	0.095	100.325	54.4107
Luqu	Zhang et al. (2017)	13LQ71	Harzburgite	0.0554	0.0396	32.4563	36.7796	16.0573	0.1502	14.6472	0.0155	0.0178	0.0037	0.1508	100.38	43.196
Luqu	Zhang et al. (2017)	13LQ72	Harzburgite	0.0562	0.0334	34.6327	34.2934	16.0416	0.1619	15.0618	0.0111	0.0059	0.0045	0.1427	100.45	39.9211
Luqu	Zhang et al. (2017)	13LQ73	Harzburgite	0.0805556	0.0677778	20.8579	47.9431	19.7913	0.206222	11.5407	0.0118889	0.0154444	0.00277778	0.0566667	100.575	60.6679
Luqu	Zhang et al. (2017)	13LQ74	Harzburgite	0.0233	0.0509	33.6595	36.1295	15.0355	0.1283	14.9474	0.0051	0.0086	0.008	0.1474	100.148	41.8705
Luqu	Zhang et al. (2017)	13LQ117-1	Harzburgite	0.01675	0.067	19.8888	48.2968	20.5819	0.203	11.5411	0.005	0.0185	0.008	0.055625	100.683	61.9706
Luqu	Zhang et al. (2017)	13LQ118-1	Harzburgite	0.00775	0.055125	20.2465	48.23	20.2785	0.22075	11.7104	0.004375	0.012875	0.009	0.041625	100.819	61.5169
Luqu	Zhang et al. (2017)	14LQ09	Harzburgite	0.009375	0.022625	32.0849	37.8068	14.6568	0.135125	15.1904	0.002375	0.022125	0.00125	0.13225	100.064	44.1567
Luqu	Zhang et al. (2017)	14LQ10	Harzburgite	0.015	0.026125	36.0877	32.95	15.5949	0.146625	15.3351	0.00575	0.01325	0.002	0.1495	100.326	37.9924
Luqu	Zhang et al. (2017)	14LQ17	Harzburgite	0.0181667	0.0463333	16.1757	52.098	20.4932	0.234	10.3153	0.004	0.0148333	0.00283333	0.0518333	99.4542	68.3675
Luqu	Zhang et al. (2017)	14LQ23	Harzburgite	0.011625	0.025125	27.4449	42.1022	16.2353	0.152125	13.874	0.00775	0.014	0.002625	0.10075	99.9704	50.7253
Luqu	Zhang et al. (2017)	14LQ24	Harzburgite	0.027375	0.030375	27.0089	41.9945	16.789	0.15975	13.6524	0.00775	0.006375	0.00475	0.089875	99.771	51.0615
Luqu	Zhang et al. (2017)	14LQ25	Harzburgite	0.0306	0.0398	24.9628	43.0959	16.121	0.1553	13.7971	0.013	0.0064	0.0024	0.1219	98.3462	53.6717
Luqu	Zhang et al. (2017)	14LQ28-1	Harzburgite	0.0151818	0.0676364	15.5494	51.9963	20.7857	0.222	10.0664	0.00281818	0.0170909	0.00436364	0.0598182	98.7866	69.1735
